# Supplementary material for: Single-component compounds with wide-range color-tunable ultralong organic phosphorescence
Source: Royal Society of Chemistry journal article supplement (doi:10.1039/d3tc02426a), 2023-01-01
Supplement: d3tc02426a1.pdf [file d3tc02426a1.pdf]

## Supporting Information

### Single-Component Four-Leaf Clover Compounds with Wide-Range Color-Tunable Ultralong Organic Phosphorescence

Weitao Sun<sup>+</sup>, Xianyin Dai<sup>+</sup>, Haiyan Ge, Xianfeng Meng, Guiyun Duan\* and Yanqing Ge\*

W. Sun and X. Dai contributed equally to this work.

#### Table of Contents

|                                                                               |     |
|-------------------------------------------------------------------------------|-----|
| Experimental procedures                                                       | S2  |
| Photometrics of triphenylmethanes                                             | S6  |
| Light stability of TTTA                                                       | S15 |
| Appendix ( <sup>1</sup> H NMR, <sup>13</sup> C NMR and HRMS of the compounds) | S20 |

## Experimental Procedures

### General

All reagents and materials were purchased from Aladdin and Energy Chemical Co. and used without further purification.  $^1\text{H}$  NMR,  $^{13}\text{C}$  NMR spectra were recorded on a Bruker Avance II 400 spectrometer. HRMS spectra were measured on an Agilent 6546 LC/Q-TOF or SCIEX TripleTOF 5600 QTRAP mass instrument and the electrospray ionization (ESI) method was used. Absorption spectra were recorded on a Shimadzu U-3900 UV-vis spectrophotometer, while the fluorescent emission, lifetimes and absolute fluorescence quantum yields were taken with an Edinburgh FS5 spectrofluorometer. HPLC were performed on Agilent 1260 Infinity Quaternary. X-ray crystallography was accomplished using a Bruker Smart-Apex-II CCD diffractometer.

### Theoretical Calculation

From the data of TTTA's single crystal, the monomer, dimer, trimer, and tetramer of TTTA were obtained. Time dependent density functional theory (TD-DFT) of B3LYP/6-31 G (d,p) level was used to calculate the HOMO orbits, LUMO orbits and excitation energy in Gaussian 16 (version A.03)<sup>[1]</sup> software. VMD<sup>[2]</sup> and Multiwfn 3.8<sup>[3,4]</sup> software were used to visualize HOMO and LUMO orbits. The spin-orbit coupling (SOC) values were evaluated through ORCA package (version 5.0.3)<sup>[5]</sup>.

### Synthesis of compound *TTP*

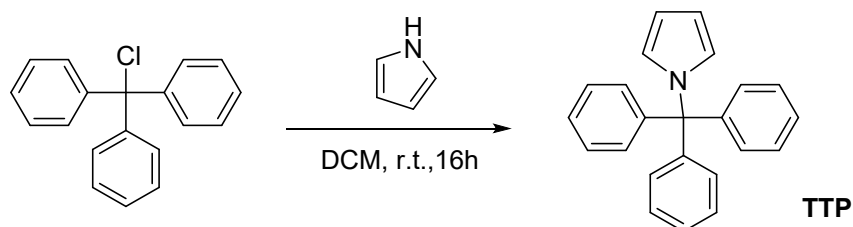

Triethylamine was slowly added to a stirred solution of 1H-pyrrole (2.00 g, 29.85 mmol) in 50 mL dichloromethane at 0 °C. (Chloromethanetriyl)tribenzene (9.19 g, 33.06 mmol) was dissolved in 50 mL dichloromethane and slowly added to the reaction mixture. The reaction was allowed to stir for 15 minutes at 0 °C and 16 hours at room

temperature. The solution was washed with water and dried by anhydrous sodium sulfate. The solvent was removed by rotary evaporation and the crude product was collected. The crude product was recrystallized by methanol to achieve the purified product. Yield: 7.60 g (grayish powder, 82%).  $^1\text{H NMR}$  (400 MHz,  $\text{CDCl}_3$ ):  $\delta$  7.69 (s, 1H), 7.20 – 7.29 (m, 9H), 7.12 – 7.14 (m, 6H), 6.72 (dd,  $J = 2.8, 4.4$  Hz, 1H), 6.15 (q,  $J = 2.6$  Hz, 1H), 6.02 (td,  $J = 2.8, 1.6$  Hz, 1H);  $^{13}\text{C NMR}$  (101 MHz,  $\text{CDCl}_3$ ):  $\delta$  146.2, 136.7, 130.4, 127.7, 126.5, 117.3, 110.3, 107.7, 60.4; HRMS (ESI):  $m/z$  calcd. for  $\text{C}_{23}\text{H}_{20}\text{N}$ , 310.1596  $[\text{M}+\text{H}]^+$ ; found: 310.1597.

#### Synthesis of compound **TPA**

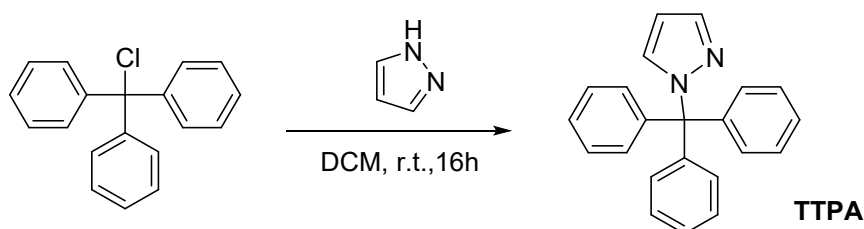

**TPA** was synthesized according to the synthetic method of **TTP**. Yield: 7.22 g (white powder, 79%).  $^1\text{H NMR}$  (400 MHz,  $\text{CDCl}_3$ ):  $\delta$  7.65 (s, 1H), 7.21 (m, 16H), 6.21 (s, 1H);  $^{13}\text{C NMR}$  (101 MHz,  $\text{CDCl}_3$ ):  $\delta$  143.5, 139.8, 132.4, 130.3, 127.8, 127.8, 104.4, 78.6; HRMS (ESI):  $m/z$  calcd. for  $\text{C}_{22}\text{H}_{18}\text{N}_2$ , 333.1368  $[\text{M}+\text{Na}]^+$ ; found: 333.1371.

#### Synthesis of compound **TTA**

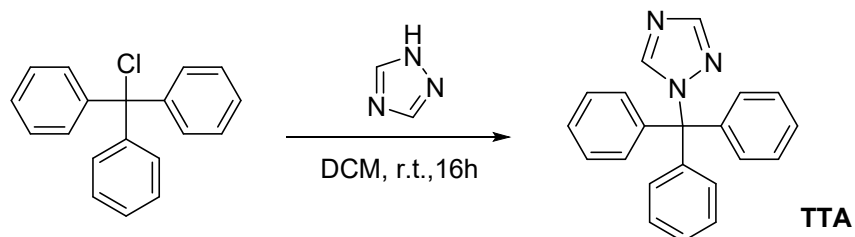

**TTA** was synthesized according to the synthetic method of **TTP**. Yield: 7.63 g (white powder, 84.6%).  $^1\text{H NMR}$  (400 MHz,  $\text{CDCl}_3$ ):  $\delta$  8.07 (s, 1H), 8.03 (s, 1H), 7.29-7.34 (m, 9H), 7.12-7.36 (m, 6H);  $^{13}\text{C NMR}$  (101 MHz,  $\text{CDCl}_3$ ):  $\delta$  151.9, 145.8, 142.0, 130.0, 128.3, 128.1, 78.1; HRMS (ESI):  $m/z$  calcd. for  $\text{C}_{21}\text{H}_{17}\text{N}_3$ , 312.1501  $[\text{M}+\text{H}]^+$ ; found: 312.1494.

### Synthesis of compound **TTTA**

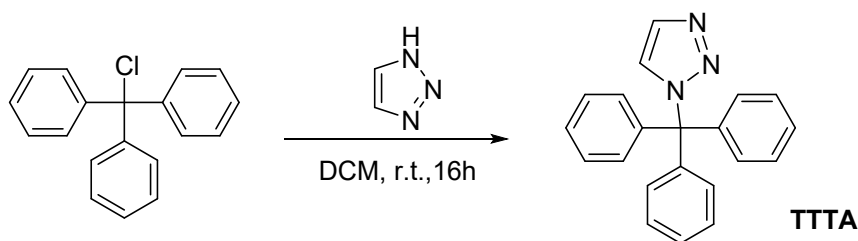

**TTTA** was synthesized according to the synthetic method of **TTP**. Yield: 7.55 g (grayish powder, 84%).  $^1\text{H}$  NMR (400 MHz,  $\text{CDCl}_3$ ):  $\delta$  7.69 (d,  $J = 1.16$  Hz, 1H), 7.46 (d,  $J = 1.24$  Hz, 1H), 7.29-7.46 (m, 9H), 7.11-7.14 (m, 6H);  $^{13}\text{C}$  NMR (101 MHz,  $\text{CDCl}_3$ ):  $\delta$  142.2, 132.0, 130.1, 128.3, 128.0, 126.6, 79.0; HRMS (ESI):  $m/z$  calcd. for  $\text{C}_{21}\text{H}_{17}\text{N}_3$ , 334.1320  $[\text{M}+\text{Na}]^+$ ; found: 334.1320.

### Synthesis of compound **DPP**

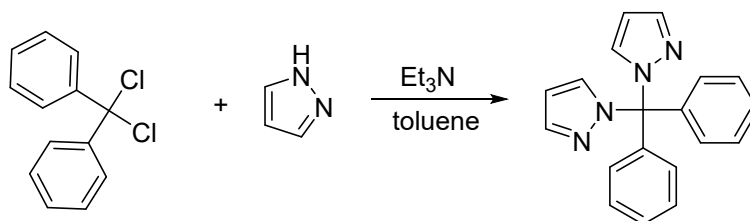

The reflux reaction mixture was heated for 3 days in a dry flask filled with argon using 1.00 g (21.0 mmol)  $\text{Ph}_2\text{CCl}_2$ , 1.32 g (19 mmol) pyrazole, 5 ml  $\text{NEt}_3$ , and 10 ml toluene. Vacuum distillation was used to remove the solvent, and the light yellow solid that resulted was refined with 3 parts of 5 methanol and column chromatography (ethyl petroleum ether acetate 40:1) to produce 0.93 g (or 87% yield) of colorless solid.  $^1\text{H}$  NMR (400 MHz,  $\text{CDCl}_3$ ):  $\delta$  7.69-7.68 (dd,  $J = 0.72, 1.72$  Hz, 2H), 7.55-7.54 (dd,  $J = 0.72, 2.48$  Hz, 2H), 7.41-7.32 (m, 6H), 7.09-7.06 (m, 4H), 6.30 (dd,  $J = 1.76, 2.60$  Hz, 2H);  $^{13}\text{C}$  NMR (101 MHz,  $\text{CDCl}_3$ ):  $\delta$  140.39, 140.36, 132.7, 129.19, 129.17, 128.04, 105.44, 87.69.

### Photometrics of triphenylmethanes

**Table S1. Photometrics of Triphenylmethanes in Air in the Solid State at 298 K**

| $\lambda_{\text{PL}}$ (nm) | $\lambda_{\text{ex}}$ (nm) | $\lambda_{\text{Phos}}$ | $\tau$ (ms) | $\phi$ |
|----------------------------|----------------------------|-------------------------|-------------|--------|
|----------------------------|----------------------------|-------------------------|-------------|--------|

|            |     | (nm) |     |                            |                            |                |
|------------|-----|------|-----|----------------------------|----------------------------|----------------|
| <b>TTP</b> | 345 | 290  | 570 | $\tau_1 = 198.4$ (28.36%)  |                            |                |
|            |     |      |     | $\tau_2 = 817.9$ (71.64%)  | 1.55%                      |                |
|            |     |      |     | $\tau = 642.3$             |                            |                |
|            | 360 | 620  | 310 | 585                        | $\tau_1 = 26.75$ (2.29%)   |                |
|            |     |      |     |                            | $\tau_2 = 239.25$ (46.37%) | 1.08% (320 nm) |
|            |     |      |     |                            | $\tau_3 = 819.7$ (51.34%)  | $\tau = 532.4$ |
| 280        | 490 | 360  | 620 | $\tau_1 = 96.2$ (29.59%)   |                            |                |
|            |     |      |     | $\tau_2 = 369.8$ (70.41%)  | 0.89% (350 nm)             |                |
|            |     |      |     | $\tau = 288.8$             |                            |                |
| <b>TPA</b> | 432 | 310  | 545 | $\tau_1 = 286.7$ (6.61%)   |                            |                |
|            |     |      |     | $\tau_2 = 1235.1$ (93.39%) | 2.19%                      |                |
|            |     |      |     | $\tau = 1172.3$            |                            |                |
|            | 360 | 590  | 310 | 545                        | $\tau_1 = 289.5$ (17.41%)  |                |
|            |     |      |     |                            | $\tau_2 = 1146.1$ (82.59%) | 1.12% (320 nm) |
|            |     |      |     |                            | $\tau = 996.9$             |                |
| 270        | 465 | 360  | 590 | $\tau_1 = 229.8$ (23.75%)  |                            |                |
|            |     |      |     | $\tau_2 = 760.1$ (76.25%)  | 0.77% (350 nm)             |                |
|            |     |      |     | $\tau = 634.2$             |                            |                |
| <b>TTA</b> | 422 | 290  | 530 | $\tau_1 = 177.4$ (10.62%)  |                            |                |
|            |     |      |     | $\tau_2 = 814.3$ (89.38%)  | 4.11%                      |                |
|            |     |      |     | $\tau = 746.7$             |                            |                |
|            | 360 | 610  | 290 | 530                        | $\tau_1 = 39.2$ (1.05%)    |                |
|            |     |      |     |                            | $\tau_2 = 165.0$ (17.52%)  | 2.82% (320 nm) |
|            |     |      |     |                            | $\tau_3 = 743.3$ (81.43%)  | $\tau = 634.7$ |
| 360        | 610 | 360  | 610 | $\tau_1 = 65.33$ (8.22%)   |                            |                |
|            |     |      |     | $\tau_2 = 245.4$ (50.23%)  | 2.16% (350 nm)             |                |
|            |     |      |     |                            |                            |                |

|             |     |     |                            |                |
|-------------|-----|-----|----------------------------|----------------|
|             |     |     | $\tau_3 = 551.5$ (41.55%)  |                |
|             |     |     | $\tau = 357.8$             |                |
|             |     |     | $\tau_1 = 50.66$ (1.35%)   |                |
|             | 280 | 490 | $\tau_2 = 402.5$ (44.40%)  | 6.29%          |
|             |     |     | $\tau_3 = 1046.4$ (54.25%) |                |
|             |     |     | $\tau = 746.8$             |                |
| <b>TTTA</b> | 375 | 310 | $\tau_1 = 25.93$ (1.04%)   |                |
|             |     | 550 | $\tau_2 = 209.4$ (17.97%)  | 4.96% (320 nm) |
|             |     |     | $\tau_3 = 818.8$ (80.99%)  |                |
|             |     |     | $\tau = 701.0$             |                |
|             |     |     | $\tau_1 = 10.86$ (1.11%)   |                |
|             | 370 | 610 | $\tau_2 = 191.3$ (37.88%)  | 3.83% (350 nm) |
|             |     |     | $\tau_3 = 608.4$ (61.01%)  |                |
|             |     |     | $\tau = 443.7$             |                |

Note:  $\tau = \tau_1 \times Rel_1\% + \tau_2 \times Rel_2\%$  or  $\tau = \tau_1 \times Rel_1\% + \tau_2 \times Rel_2\% + \tau_3 \times Rel_3\%$ .

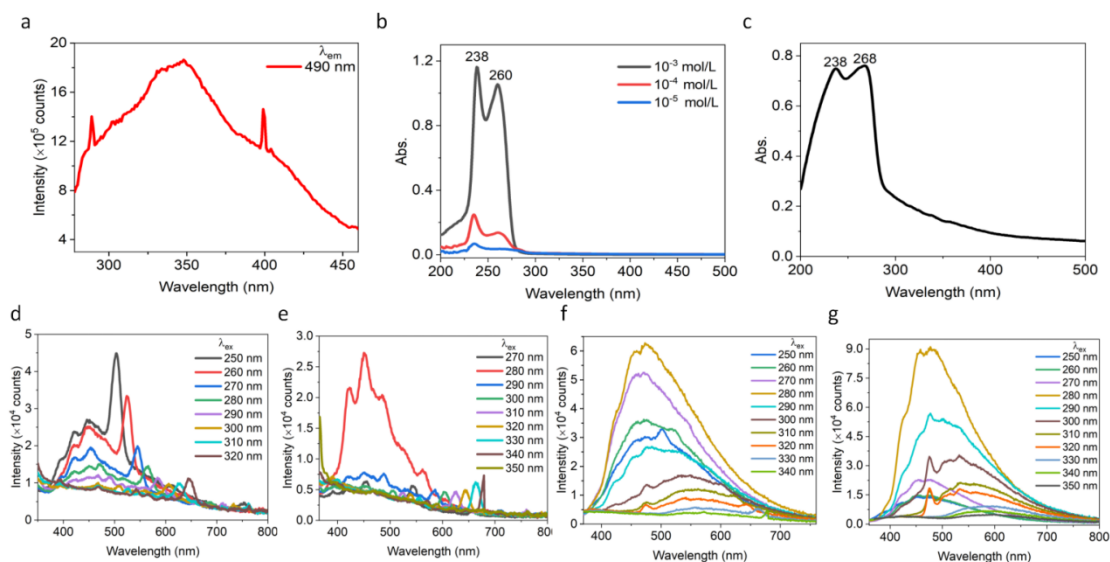

**Figure S1.** (a) Excitation spectra of **TTTA** with emission wavelength of 490 nm (slit = 0.8, 0.8). (b) UV absorption spectra of THF solutions with different concentrations of **TTTA**. (c) UV absorption spectra of **TTTA** solids. (d) Phosphorescent spectra of PMMA films containing 1% **TTTA** (delay time: 0.1 ms, slit = 1.2, 1.2). (e) Phosphorescent spectra of PMMA films containing 10% **TTTA** (delay time: 0.1 ms, slit = 1.2, 1.2). (f) Phosphorescent spectra of PMMA films containing 30% **TTTA**

(delay time: 0.1 ms, slit = 1.2, 1.2). (g) Phosphorescent spectra of PMMA films containing 50% TTTA (delay time: 0.1 ms, slit = 1.2, 1.2).

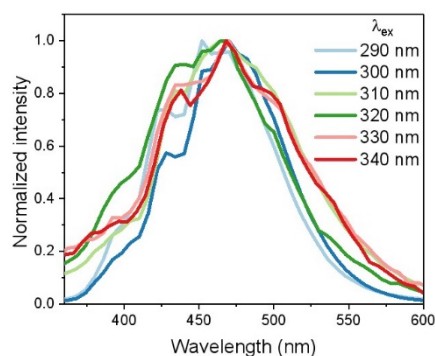

**Figure S2.** Phosphorescent spectra of TTTA ( $10^{-5}$  M) in dilute dichloromethane solution (delay time: 0.1 ms) at 77 K under various excitations.

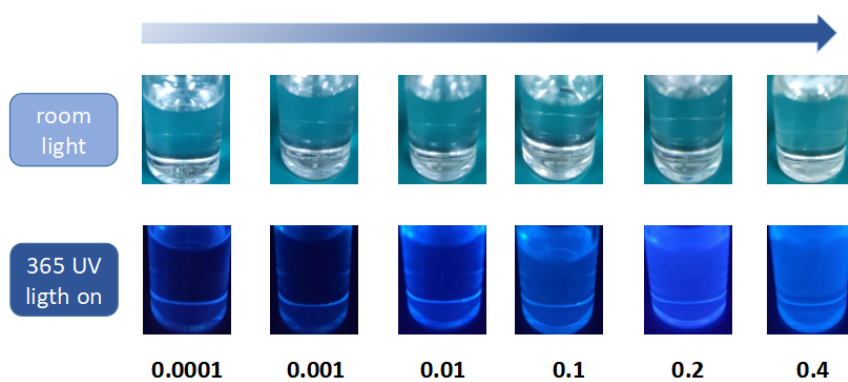

**Figure S3.** Different concentrations of TTTA dichloromethane solutions from 0.0001 M to 0.4 M under room light and a 365 nm UV lamp.

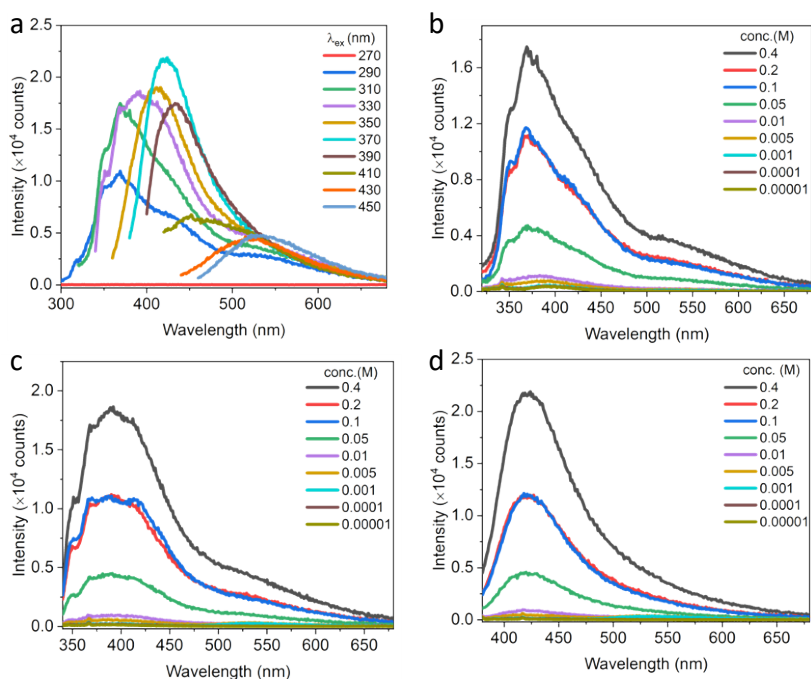

**Figure S4.** (a) Different excitation wavelengths of the 0.4 M dichloromethane TTTA solution's PL spectrum (slit = 1.2, 1.2). PL spectra of different dichloromethane solutions of TTTA with  $\lambda_{\text{ex}}$  of (b) 310 nm (slit = 1.2, 1.2), (c) 330 nm (slit = 1.2, 1.2). (d) 370 nm (slit = 1.2, 1.2).

**Table S2.** Emission peak wavelength of 0.4M TTTA solution of dichloromethane with different excitation wavelength.

| $\lambda_{\text{ex}}$ (nm) | $\lambda_{\text{em}}$ (nm) |
|----------------------------|----------------------------|
| 290                        | 369                        |
| 310                        | 369                        |
| 330                        | 391                        |
| 350                        | 413                        |
| 370                        | 421                        |
| 390                        | 434                        |
| 410                        | 456                        |
| 430                        | 521                        |
| 450                        | 531                        |



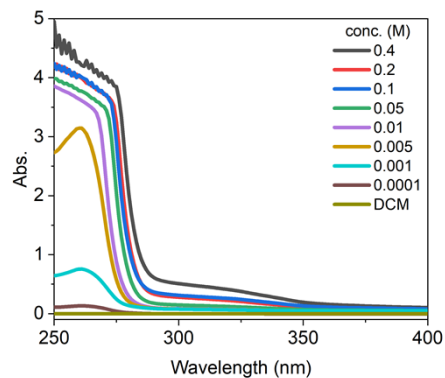

**Figure S5.** Absorption of varied concentrations of TTTA in dichloromethane solution.

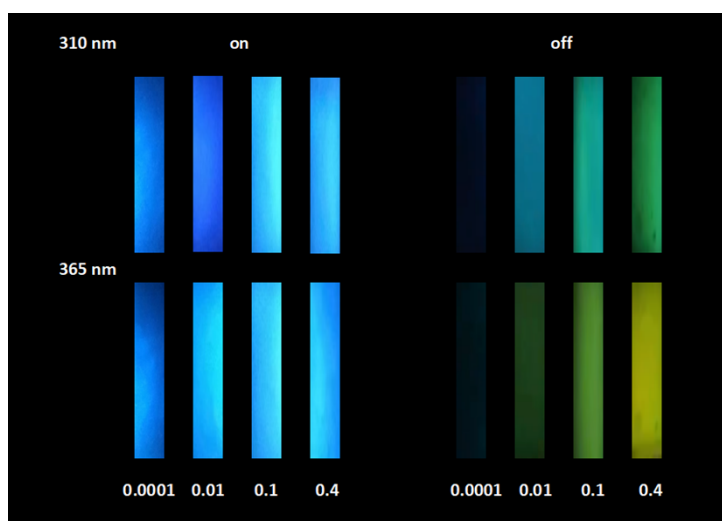

**Figure S6.** Photos of different concentrations of TTTA dichloromethane solution taken at 77 K under UV excitation or removing the UV excitation source.

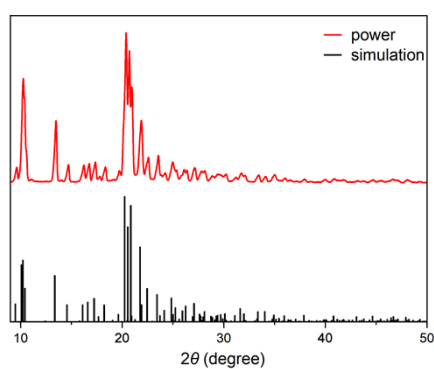

**Figure S7.** Powder XRD and simulated XRD of TTTA.

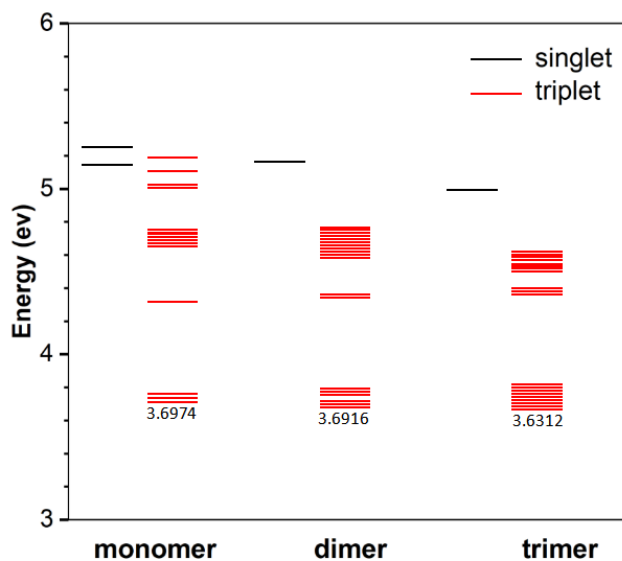

**Figure S8.** The excitation energy diagram of monomer, dimer and trimer of TTTA.

**Table S3.** The different excited energy of TTTA.

| Aggregaton state | Excited state | Excited energy (ev) |
|------------------|---------------|---------------------|
| monomer          | S1            | 5.1451              |
|                  | T1            | 3.6974              |
|                  | T2            | 3.7038              |
|                  | T3            | 3.7377              |
| dimer            | S1            | 5.1731              |
|                  | T1            | 3.6916              |
|                  | T2            | 3.6985              |
| trimer           | S1            | 4.9791              |
|                  | T1            | 3.6312              |
|                  | T2            | 3.6852              |
|                  | T3            | 3.6931              |

**Table S4.** The spin-orbit coupling (SOC) values for  $S_1$ - $T_1$  of TTTA's monomer, dimer, trimer and tetramer.

| Monomer | Dimer | Trimer | tetramer |
|---------|-------|--------|----------|
|---------|-------|--------|----------|

$$\xi (S_1, T_1) \quad 0.5847 \text{ cm}^{-1} \quad 0.3457 \text{ cm}^{-1} \quad 0.1841 \text{ cm}^{-1} \quad 0.0436 \text{ cm}^{-1}$$

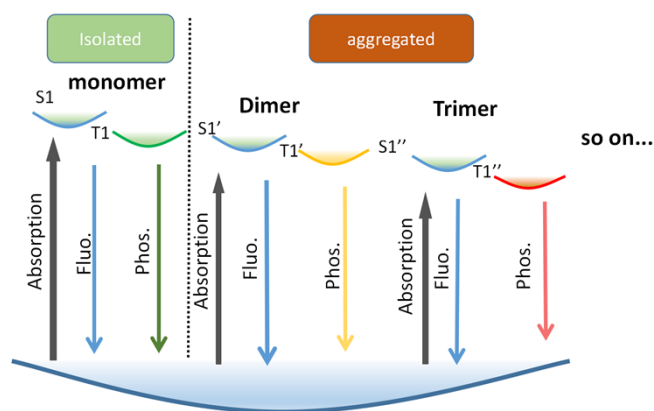

**Figure S9.** The corresponding simplified Jablonski diagrams for the generation of color-tunable emission.

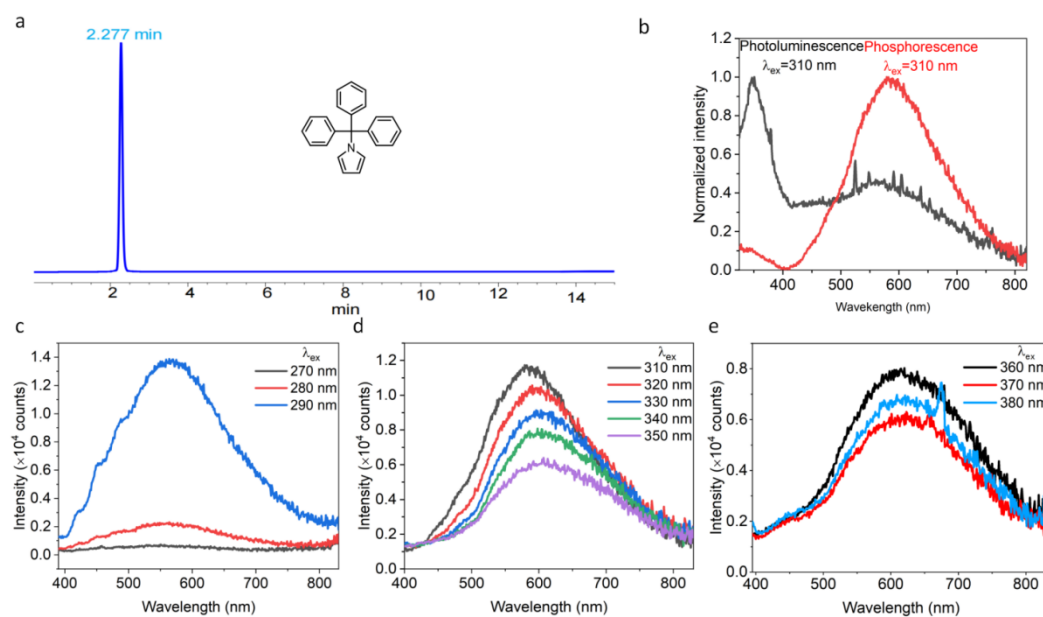

**Figure S10.** (a) HPLC spectra of **TTP** in methanol, flow rate 1.0 mL / min. (b) Normalized photoluminescence and phosphorescence spectra of **TTP** at 298 K. (c)(d)(e) Phosphorescence spectra of **TTP** with different excitation wavelengths (delay time: 0.1 ms, slit = 1.2, 1.2).

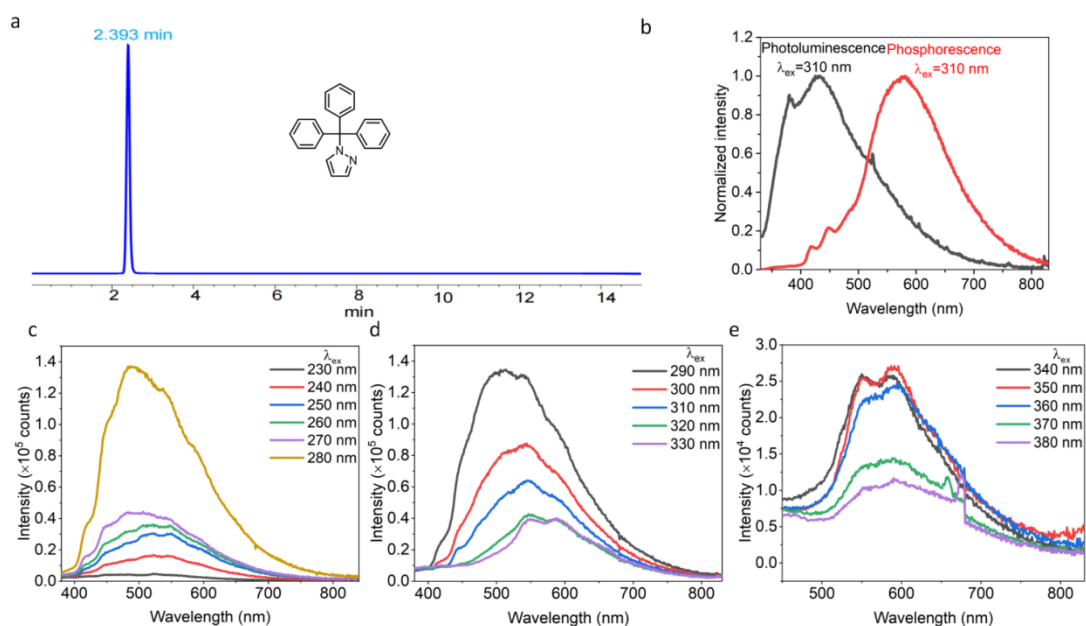

**Figure S11.** (a) HPLC spectra of **TPA** in methanol, flow rate 1.0 mL / min. (b) Normalized photoluminescence and phosphorescence spectra of **TPA** at 298 K. (c)(d)(e) Phosphorescence spectra of **TPA** with different excitation wavelengths (delay time: 0.1 ms, slit = 1.2, 1.2).

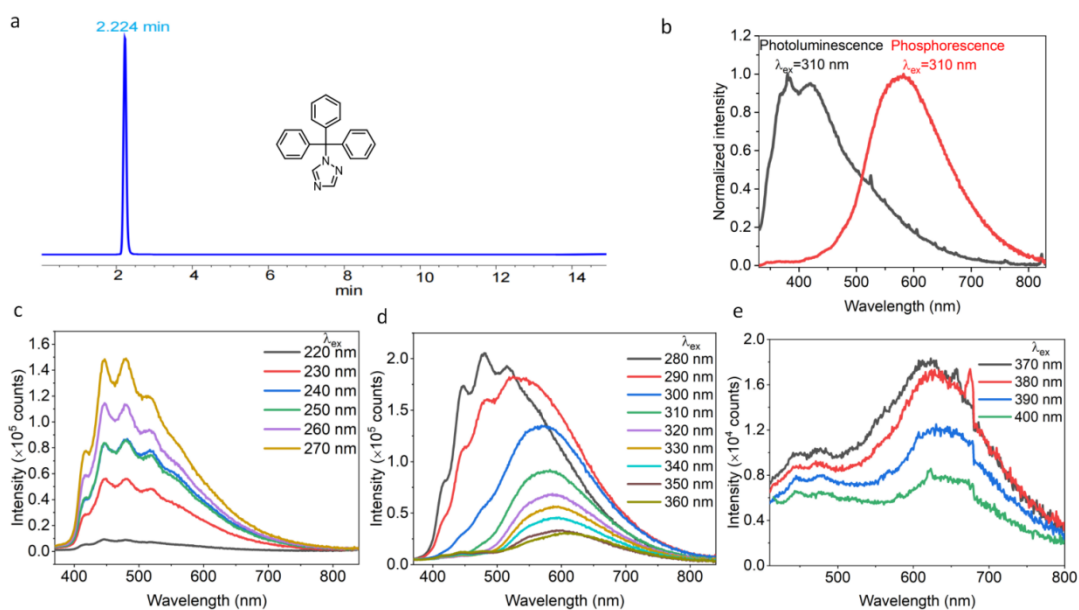

**Figure S12.** (a) HPLC spectra of **TTA** in methanol, flow rate 1.0 mL / min. (b) Normalized photoluminescence and phosphorescence spectra of **TTA** at 298 K. (c)(d)(e) Phosphorescence spectra of **TTA** with different excitation wavelengths (delay time: 0.1 ms, slit = 1.2, 1.2).

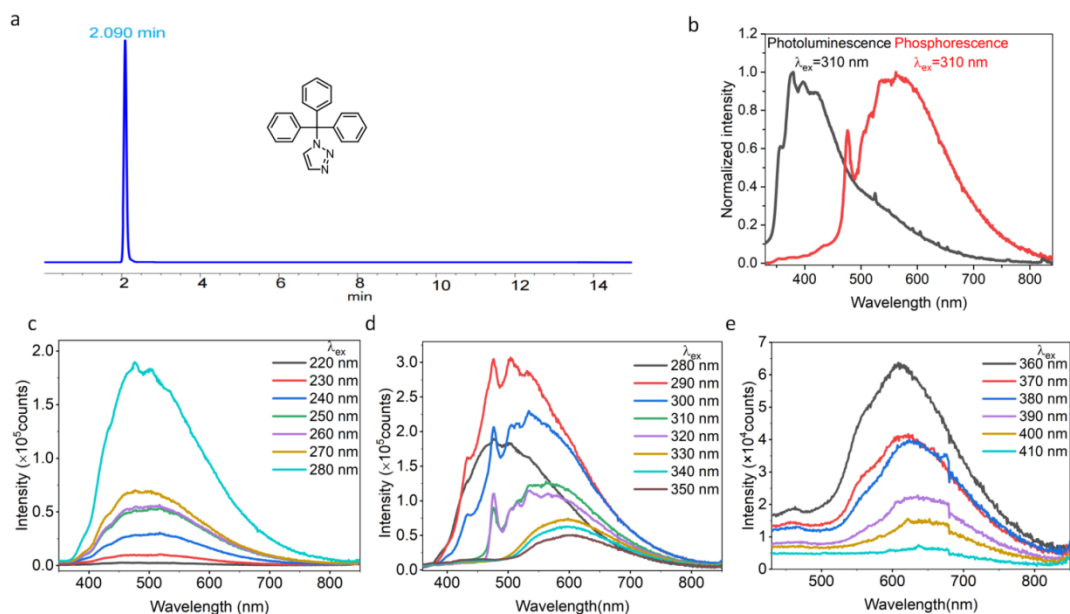

**Figure S13.** (a) HPLC spectra of **TTTA** in methanol, flow rate 1.0 mL / min. (b) Normalized photoluminescence and phosphorescence spectra of **TTTA** at 298 K. (c)(d)(e) Phosphorescence spectra of **TTTA** with different excitation wavelengths (delay time: 0.1 ms, slit = 1.2, 1.2).

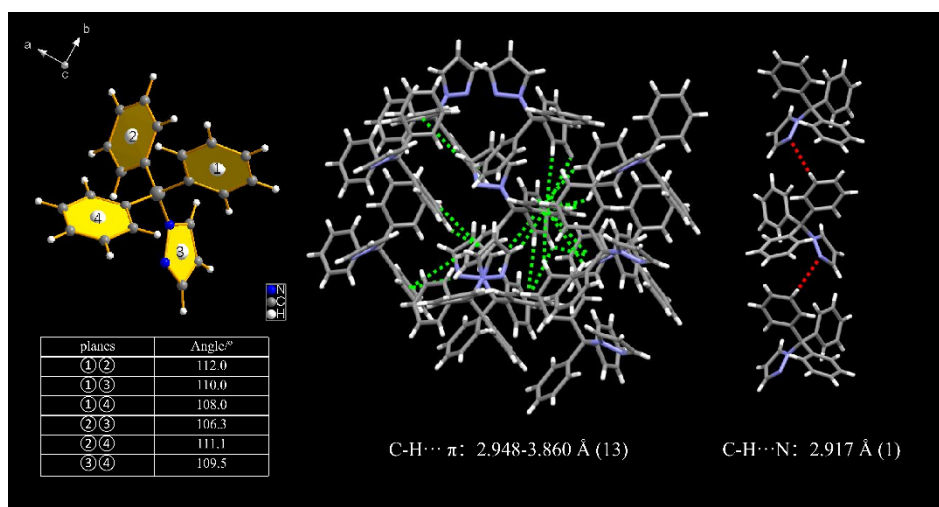

**Figure S14.** The crystal structure and intermolecular interactions of **TPA**.

**Table S5.** Comparison of molecular interactions between **TPA** and **TTTA**.

|                | TPA (Å)  | TTTA (Å) |
|----------------|----------|----------|
|                | 3.068(2) | 2.948    |
|                | 3.283    | 2.986(2) |
|                | 3.368(2) | 3.001(2) |
|                | 3.399    | 3.312(2) |
|                | 3.410(2) | 3.413(2) |
|                | 3.433    | 3.549(2) |
| <b>C-H...π</b> | 3.492(2) | 3.602(2) |

|         |          |          |
|---------|----------|----------|
|         | 3.506(2) | 3.632    |
|         | 3.518(2) | 3.680(2) |
|         | 3.534(2) | 3.674(2) |
|         | 3.637    | 3.705(2) |
|         | 3.837(2) | 3.715(2) |
|         | 3.867    | 3.774(2) |
|         |          | 3.860(2) |
|         |          | 2.757    |
| C-H...N | 2.917(2) | 2.811(2) |
|         |          | 2.821    |

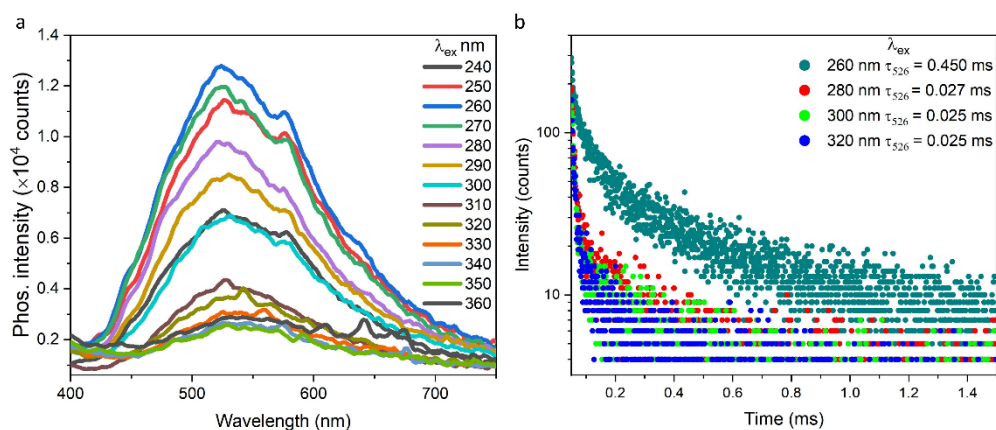

**Figure S15.** (a) Phosphorescence spectra of tetraphenylmethane (delay time: 0.1 ms, slit = 5, 5). (b) Phosphorescence lifetime diagram of tetraphenylmethane.

**Table S6.** Phosphorescence lifetime of tetraphenylmethane at different excitation wavelengths.

|                       |       |       |       |       |       |       |       |
|-----------------------|-------|-------|-------|-------|-------|-------|-------|
| $\lambda_{ex}$ (nm)   | 240   | 260   | 280   | 300   | 320   | 340   | 360   |
| $\lambda_{Phos}$ (nm) | 526   | 526   | 526   | 526   | 526   | 526   | 526   |
| $\tau$ (ms)           | 0.031 | 0.450 | 0.027 | 0.025 | 0.025 | 0.023 | 0.022 |

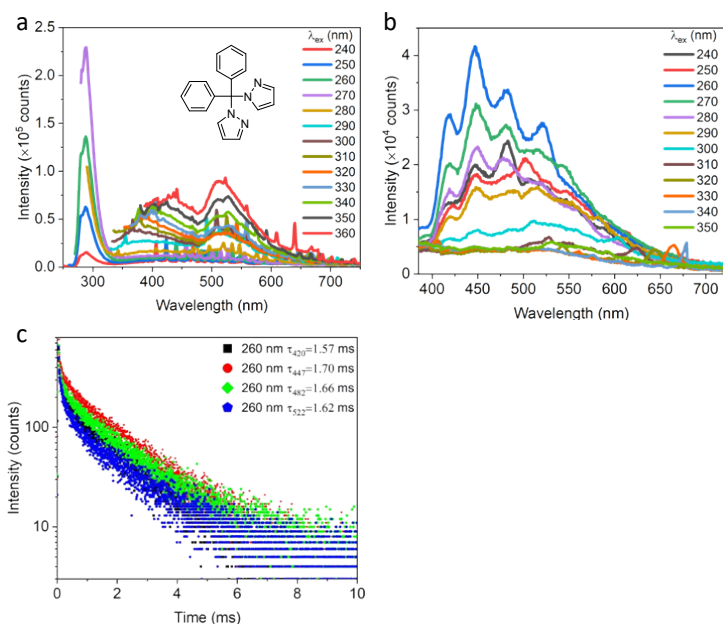

**Figure S16.** (a) PL spectra of the **DPP** under different excitation wavelengths (slit = 1.5, 1.5). (b) Phosphorescence spectra of the **DPP** under different excitation wavelengths (delay time: 0.1 ms, slit = 4, 4). (c) Phosphorescence lifetime diagram of **DPP** at 260 nm excitation under ambient conditions

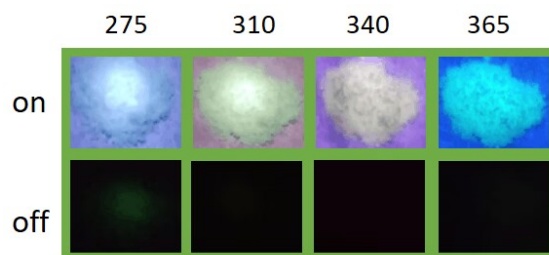

**Figure S17.** Photos of **DPP** taken at room temperature under different UV excitation or removing the UV excitation source.

### Light stability of TTTA.

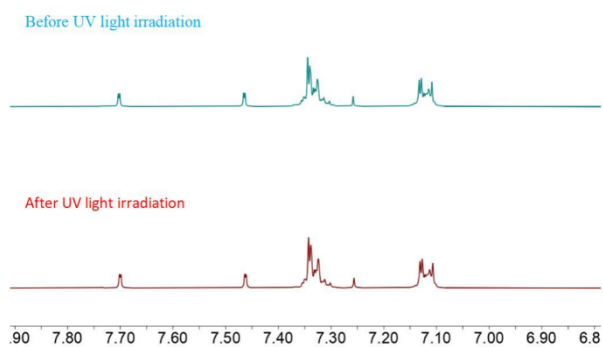

**Figure S18.** Comparison of the <sup>1</sup>H NMR of compound **TTTA** before and after ultraviolet irradiation at 275 nm.

**Table S7.** Excitation dependent comparison of phosphorescence data for different compounds.

| Structure                                                                           | $\lambda_{\text{ex}}$<br>(nm)                                                       | $\lambda_{\text{em}}$<br>(nm) | $\tau$ (ms)           | Stokes<br>shift<br>(nm) | Ref |     |
|-------------------------------------------------------------------------------------|-------------------------------------------------------------------------------------|-------------------------------|-----------------------|-------------------------|-----|-----|
| cadmium(II)<br>based<br>complexes                                                   | 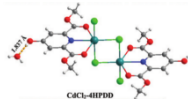   | 320                           | 474                   | 75.31                   | 154 | [6] |
|                                                                                     |    | 380                           | 536                   | 49.57                   | 156 |     |
|                                                                                     |                                                                                     | 380                           | 588                   | 52.59                   | 208 |     |
|                                                                                     |                                                                                     | 380                           | 648                   | 49.92                   | 268 |     |
| Acenes with<br>benzophenone<br>derivatives                                          |    | 26                            | 523                   | 0.035±0.002<br>(68%)    | 263 | [7] |
|                                                                                     |                                                                                     | 0                             | 263                   | 0.24±0.002<br>(27%)     |     |     |
|                                                                                     |                                                                                     |                               | 1.35 ± 0.17<br>(5%)   |                         |     |     |
|                                                                                     |                                                                                     |                               | 0.48 ± 0.05<br>(58%)  | 436                     |     |     |
|                                                                                     |                                                                                     | 696                           | 3.52 ± 0.02<br>(42%)  |                         |     |     |
|                                                                                     |  | 26                            | 535                   | 0.037 ± 0.002<br>(68%)  | 275 |     |
|                                                                                     |                                                                                     | 0                             | 275                   | 0.23 ± 0.003<br>(25%)   |     |     |
|                                                                                     |                                                                                     |                               |                       | 3.0 ± 0.4 (7%)          |     |     |
|                                                                                     |                                                                                     |                               | 710                   | 0.676 ± 0.008<br>(53%)  | 450 |     |
|                                                                                     |                                                                                     |                               | 3.804 ± 0.02<br>(47%) |                         |     |     |
| poly(2-<br>vinylpyridine<br>)                                                       |  | 360                           | 568                   | 364.74                  | 208 | [8] |
|                                                                                     |                                                                                     | 380                           | 533                   | 354.05                  | 153 |     |
|                                                                                     |                                                                                     | 400                           | 529                   | 265.89                  | 129 |     |
|                                                                                     |                                                                                     | 420                           | 536                   | 182.59                  | 116 |     |
|                                                                                     | 440                                                                                 | 545                           | 131.87                | 105                     |     |     |
|                                                                                     |  | 360                           | 571                   | 149.60                  | 211 |     |
|                                                                                     |                                                                                     | 380                           | 537                   | 131.27                  | 157 |     |
|                                                                                     |                                                                                     | 400                           | 529                   | 139.25                  | 129 |     |
|                                                                                     |                                                                                     |                               |                       |                         |     |     |
|  | 254                                                                                 | 487/5                         | 373                   | 233/26                  |     |     |
|                                                                                     |                                                                                     | 15                            |                       | 1                       |     |     |
|                                                                                     | 360                                                                                 | 487/5                         | 107                   | 125/15                  |     |     |



|                                          |                                                                                     |      |         |             |        |      |     |        |
|------------------------------------------|-------------------------------------------------------------------------------------|------|---------|-------------|--------|------|-----|--------|
| Pyranone-based compounds                 | 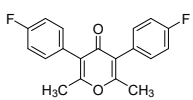   | 254  | 15      | 490/5       | 442    | 5    | [9] |        |
|                                          |                                                                                     |      |         | 18          |        |      |     | 236/26 |
|                                          |                                                                                     | 360  |         | 490/5       | 134    | 4    |     | 130/15 |
|                                          |                                                                                     |      |         | 18          |        |      |     | 8      |
|                                          |                                                                                     | 254  |         | 489/5       | 170    | 3    |     | 235/26 |
|                                          |                                                                                     |      |         | 17          |        |      |     | 3      |
|                                          |    | 254  |         | 489/5       | 67     | 5    | [9] |        |
|                                          |                                                                                     |      |         | 17          |        |      |     | 129/15 |
|                                          |                                                                                     | 360  |         | 489/5       | 38     | 0    |     | 232/26 |
|                                          |                                                                                     |      |         | 14          |        |      |     | 5      |
|                                          |                                                                                     | 254  |         | 486/5       | 11     | 4    |     | 126/15 |
|                                          |                                                                                     |      |         | 14          |        |      |     | 4      |
| Two-Component Ionic Crystals             |    | 360- | 430     | 126.1       | 70-20  | [10] |     |        |
|                                          |                                                                                     | 410  | 495     | 430.5(257K) | 135-85 |      |     |        |
|                                          |                                                                                     | 355- | 478     | 133         | 123-78 |      |     |        |
|                                          | 400                                                                                 | 512  | 104.8   | 157-112     |        |      |     |        |
|                                          |                                                                                     | 546  | no data | 191-146     |        |      |     |        |
|                                          |                                                                                     |      |         |             |        |      |     |        |
| Based on Pyrene-Doped Amorphous Polymers |  |      | 470     | 1866        | 216    | [11] |     |        |
|                                          |                                                                                     |      | 512     | 852         | 258    |      |     |        |
|                                          |                                                                                     | 254  | 554     | 614         | 300    |      |     |        |
|                                          |                                                                                     |      | 590     | 459         | 336    |      |     |        |
|                                          |                                                                                     |      | 652     | 418         | 398    |      |     |        |
|                                          | 710                                                                                 | 411  | 456     |             |        |      |     |        |
| Polymer films based on arylboronic       |  | 254  | 470     | 2430        | 216    | [12] |     |        |
|                                          |                                                                                     |      |         |             |        |      |     |        |
|                                          |                                                                                     | 254  | 485     | 2340        | 226    |      |     |        |
|                                          |                                                                                     |      |         |             |        |      |     |        |
|                                          |                                                                                     | 312  | 525     | 1480        | 213    |      |     |        |
|                                          |                                                                                     |      |         |             |        |      |     |        |
|                                          |  | 312  | 535     | 1330        | 223    |      |     |        |
|                                          |                                                                                     |      |         |             |        |      |     |        |

|                                                            |                                                                                     |             |                |                     |             |      |
|------------------------------------------------------------|-------------------------------------------------------------------------------------|-------------|----------------|---------------------|-------------|------|
| alcohol<br>(PVA)                                           | 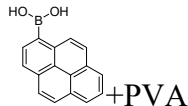   | 365         | 610            | 340                 | 245         |      |
|                                                            |    | 254         | 468            | 2410                | 214         |      |
|                                                            |    | 312         | 528            | 1380                | 216         |      |
|                                                            |    | 365         | 615            | 370                 | 250         |      |
| single-<br>component<br>molecular<br>crystal               |                                                                                     |             |                | 59.88(89.30%)       |             |      |
|                                                            |    | 320         | 465            | 239.89(2.39%)       | 145         |      |
|                                                            |                                                                                     |             |                | 582.44(8.31%)       |             |      |
|                                                            |                                                                                     |             |                | 54.43(7.13%)        |             |      |
|                                                            |                                                                                     | 365         | 505            | 334.37(57.25%)      | 140         |      |
|                                                            |                                                                                     |             |                | 745.39(41.63%)      |             |      |
|                                                            |                                                                                     |             |                | 19.38(9.48%)        |             |      |
|                                                            |                                                                                     | 290         | 430            | 202.28(17.16%)      | 140         |      |
|                                                            |                                                                                     |             |                | 2451.99(73.36)      |             |      |
|                                                            |                                                                                     |             |                | 19.60(12.35%)       |             |      |
| Lanthanide<br>cations<br>doped<br>coordination<br>polymers |   | 340         | 470            | 190.98(48.25%)      | 130         |      |
|                                                            |                                                                                     |             |                | 1638.82(39.40<br>%) |             | [13] |
|                                                            |                                                                                     |             |                | 16.48(26.66%)       |             |      |
|                                                            |                                                                                     | 270         | 380            | 86.98(26.52%)       | 110         |      |
|                                                            |  |             |                | 452.83(46.83%)      |             |      |
|                                                            |                                                                                     |             |                | 6.23(17.66%)        |             |      |
| Lanthanide<br>cations<br>doped<br>coordination<br>polymers |  | 330         | 450            | 86.43(33.69%)       | 120         |      |
|                                                            |                                                                                     |             |                | 551.53(48.64%)      |             |      |
|                                                            |                                                                                     |             |                | 46.43(41.37%)       |             |      |
|                                                            |                                                                                     | 330         | 370            | 136.79(58.63%)      | 40          |      |
|                                                            |                                                                                     |             | 123.15(42.73%) |                     |             |      |
|                                                            |                                                                                     | 521         | 543.84(52.27%) | 191                 |             |      |
| Lanthanide<br>cations<br>doped<br>coordination<br>polymers |  | 250-<br>340 | 510            | 454                 | 260-<br>170 | [14] |
|                                                            |                                                                                     |             | 615            | 10.54               | 365-<br>275 |      |
| Lanthanide<br>cations<br>doped<br>coordination<br>polymers |  | 320         | 460            | 630                 | 140         |      |
|                                                            |  | 340         | 607            | 210                 | 267         | [15] |
|                                                            |  | 320         | 460            | 460                 | 140         |      |
|                                                            |  | 340         | 607            | 100                 | 267         |      |

|                              |                                                                                         |     |     |      |     |           |
|------------------------------|-----------------------------------------------------------------------------------------|-----|-----|------|-----|-----------|
| pyrene derivatives           | 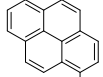       | 320 | 460 | 290  | 140 |           |
| doped polymer films          |  + PVA | 340 | 607 | 130  | 267 |           |
|                              |  + PV  | 320 | 460 | 670  | 140 |           |
|                              |  + PV  | 340 | 607 | 320  | 267 |           |
| A                            |                                                                                         |     |     |      |     |           |
| triphenylmethane derivatives |        | 290 | 570 | 642  | 280 |           |
|                              |        | 310 | 580 | 532  | 270 |           |
|                              |        | 360 | 620 | 288  | 260 |           |
|                              |        | 280 | 490 | 1172 | 210 |           |
|                              |        | 310 | 545 | 996  | 235 |           |
|                              |        | 360 | 590 | 634  | 230 | This work |
|                              |        | 270 | 455 | 746  | 185 |           |
|                              |       | 290 | 530 | 637  | 240 |           |
|                              |      | 360 | 610 | 357  | 250 |           |
|                              |      | 280 | 470 | 747  | 190 |           |
|                              |      | 310 | 550 | 701  | 240 |           |
|                              |      | 370 | 610 | 444  | 240 |           |

**Note:** It could be seen that the current excitation-dependent phosphorescence emission mainly focused on metal-containing complex or multi-component doped polymer films, however, the single-component molecular phosphorescence featuring wide-range color-tunable RTP emissions from blue to red as well as ultralong lifetimes is still rare.

## Reference

- [1] M. J. Frisch, G. W. Trucks, H. B. Schlegel, G. E. Scuseria, M. A. Robb, J. R. Cheeseman, G. Scalmani, V. Barone, G. A. Petersson, H. Nakatsuji, X. Li, M. Caricato, A. V. Marenich, J. Bloino, B. G. Janesko, R. Gomperts, B. Mennucci, H. P. Hratchian, J. V. Ortiz, A. F. Izmaylov, J. L. Sonnenberg, D. Williams-Young, F. Ding, F. Lipparini, F. Egidi, J. Goings, B. Peng, A. Petrone, T. Henderson, D. Ranasinghe, V. G. Zakrzewski, J. Gao, N. Rega, G. Zheng, W. Liang, M. Hada, M. Ehara, K. Toyota, R. Fukuda, J. Hasegawa, M. Ishida, T. Nakajima, Y. Honda, O. Kitao, H. Nakai, T. Vreven, K. Throssell, J. A. Montgomery, Jr., J. E. Peralta, F. Ogliaro, M. J. Bearpark, J. J. Heyd, E. N. Brothers, K. N. Kudin, V. N. Staroverov, T. A. Keith, R. Kobayashi, J. Normand, K. Raghavachari, A. P. Rendell, J. C. Burant, S. S. Iyengar, J. Tomasi, M. Cossi, J. M. Millam, M. Klene, C. Adamo, R. Cammi, J. W. Ochterski, R. L. Martin,

- K. Morokuma, O. Farkas, J. B. Foresman, D. J. Fox, Gaussian 16, Revision A.03.
- [2] W. Humphrey, A. Dalke, K. Schulten, *J. Molec. Graphics*, 1996, 14, 33-38.
- [3] T. Lu, F. Chen, *J. Comput. Chem.*, 2012, 33, 580-592.
- [4] T. Lu, F. Chen, *Acta Chim. Sinica*, 2011, 69, 2393-2406.
- [5] a) F. Neese, *Wires. Comput. Mol. Sci.*, 2012, 2, 73-78; b) F. Neese, *Wires. Comput. Mol. Sci.*, 2018, 8, e1327.
- [6] S. Wu, B. Zhou, X. Fang and D. Yan, *Chem. Commun.*, 2022, 58, 6136-6139.
- [7] R. Gao, Y. Cha, H. Fu and Z. Yu, *Adv. Opt. Mater.*, 2022, 11, 2202095.
- [8] H. Du, W. Zhao, Y. Xia, S. Xie, Y. Tao, Y. Q. Gao, J. Zhang and X. Wan, *Aggregate*, 2023, 4, e276.
- [9] M. Wang, F. Li, Y. Lei, F. Xiao, M. Liu, S. Liu, X. Huang, H. Wu and Q. Zhao, *Chem. Eng. J.*, 2022, 429, 132288.
- [10] G. Xiao, Y. J. Ma, X. Fang and D. Yan, *ACS Appl. Mater. Interfaces*, 2022, 14, 30246-30255.
- [11] Z. Wang, L. Gao, Y. Zheng, Y. Zhu, Y. Zhang, X. Zheng, C. Wang, Y. Li, Y. Zhao and C. Yang, *Angew. Chem. Int. Ed.*, 2022, 61, e202203254.
- [12] D. Li, J. Yang, M. Fang, B. Z. Tang and Z. Li, *Sci. Adv.*, 2022, 8, eabl8392.
- [13] L. Gu, H. Shi, L. Bian, M. Gu, K. Ling, X. Wang, H. Ma, S. Cai, W. Ning, L. Fu, H. Wang, S. Wang, Y. Gao, W. Yao, F. Huo, Y. Tao, Z. An, X. Liu and W. Huang, *Nat. Photon.*, 2019, 13, 406-411.
- [14] Y. Yang, K. Z. Wang and D. Yan, *ACS Appl. Mater. Interfaces*, 2017, 9, 17399-17407.
- [15] Y. Su, Y. Zhang, Z. Wang, W. Gao, P. Jia, D. Zhang, C. Yang, Y. Li and Y. Zhao, *Angew. Chem. Int. Ed.*, 2020, 59, 9967-9971.

## Appendix (<sup>1</sup>H NMR, <sup>13</sup>C NMR and HRMS of the compounds)

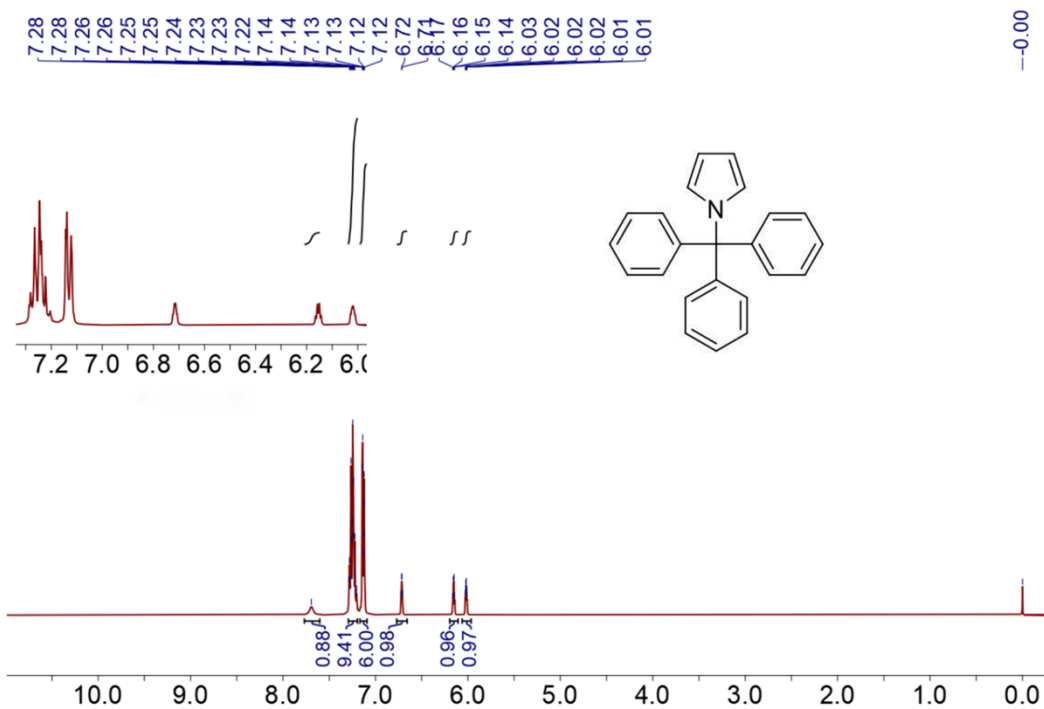

**Figure S19.** The <sup>1</sup>H NMR spectrum of TTP molecule in CDCl<sub>3</sub>.

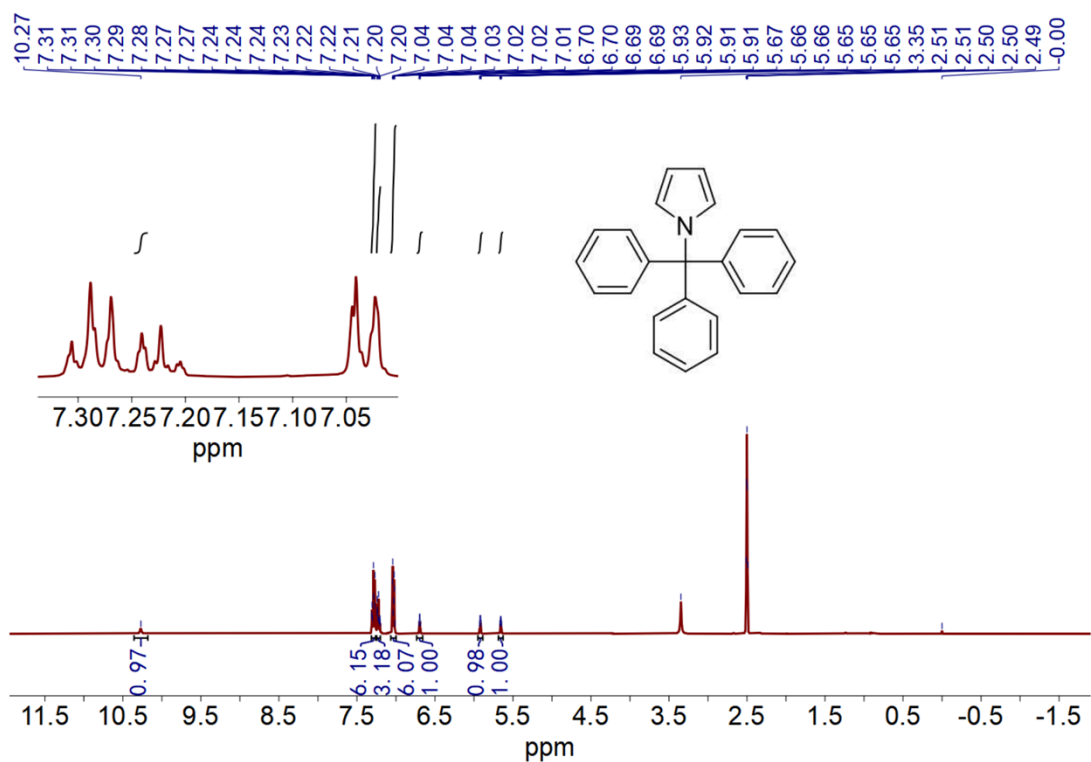

**Figure S20.** The <sup>1</sup>H NMR spectrum of TTP molecule in CD<sub>3</sub>SOCD<sub>3</sub>.

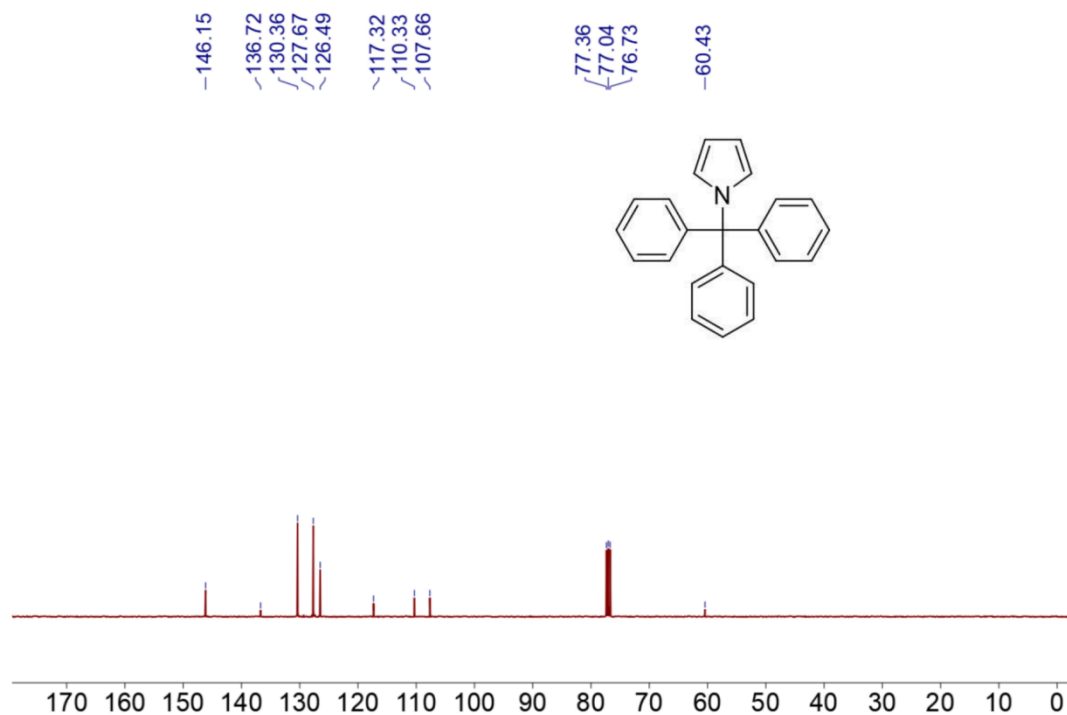

**Figure S21.** The  $^{13}\text{C}$  NMR spectrum of TTP molecule in  $\text{CDCl}_3$ .

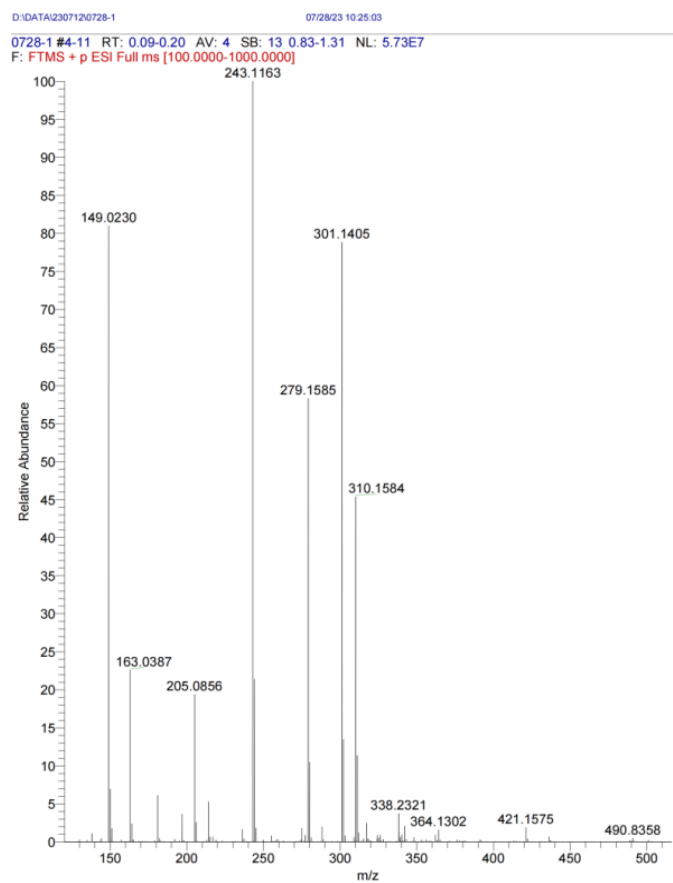

**Figure S22.** The mass spectrum of TTP molecule.

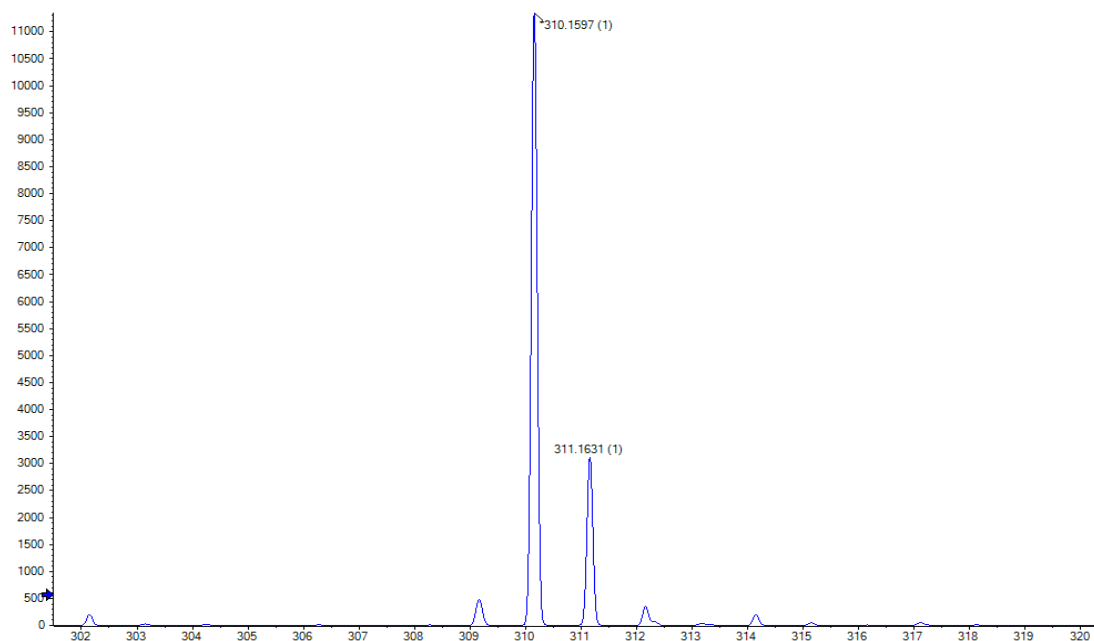

**Figure S23.** The mass spectrum of TTP molecule.

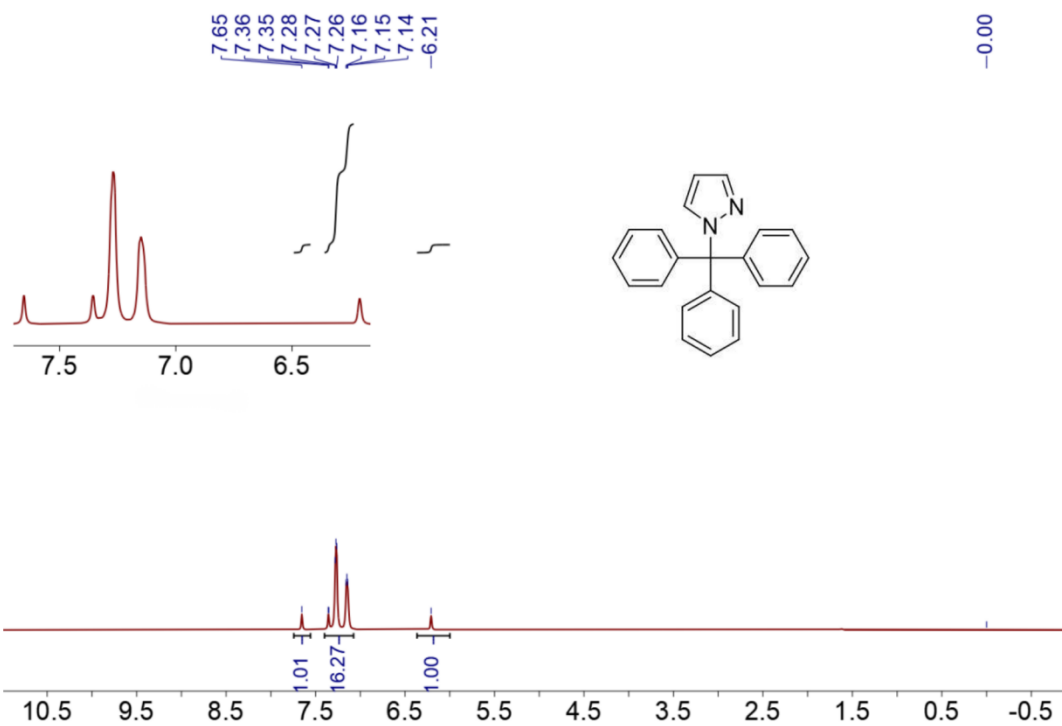

**Figure S24.** The <sup>1</sup>H NMR spectrum of TPA molecule in CDCl<sub>3</sub>.

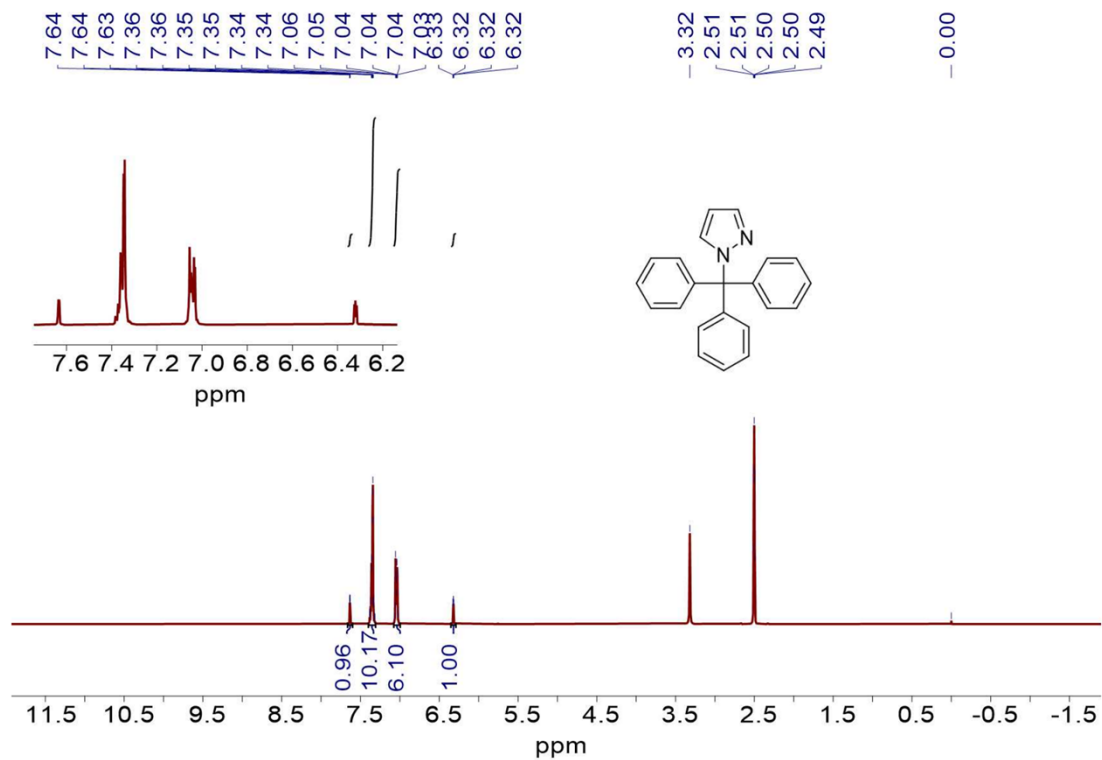

**Figure S25.** The <sup>1</sup>H NMR spectrum of TPA molecule in CD<sub>3</sub>SOCD<sub>3</sub>.

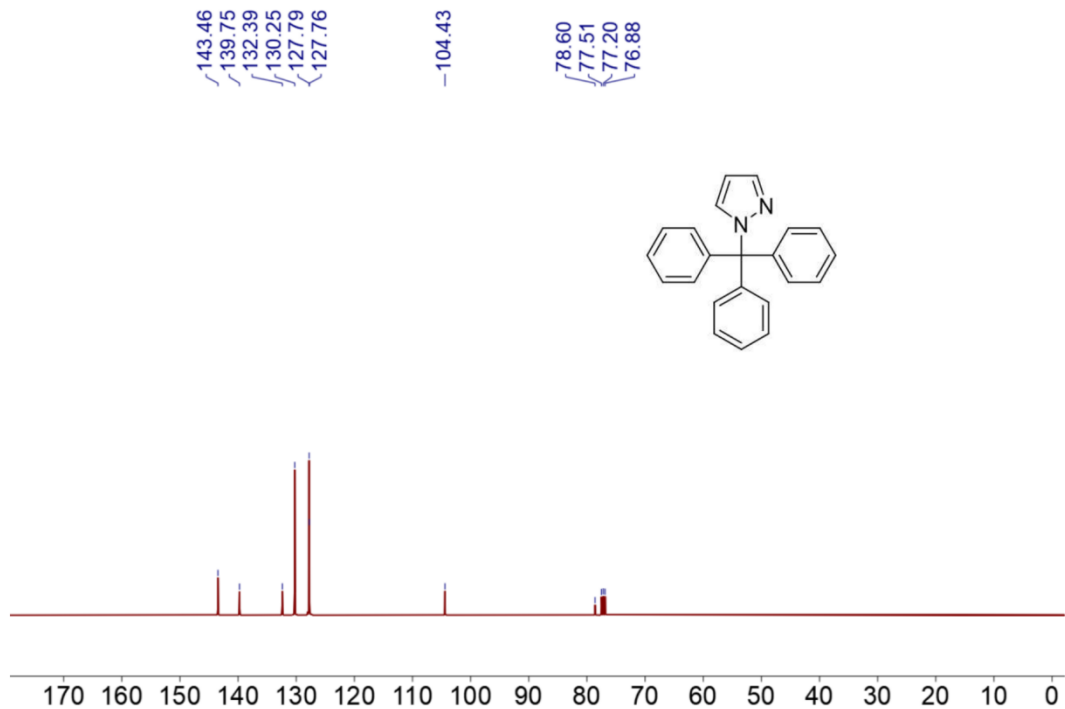

**Figure S26.** The <sup>13</sup>C NMR spectrum of TPA molecule in CDCl<sub>3</sub>.



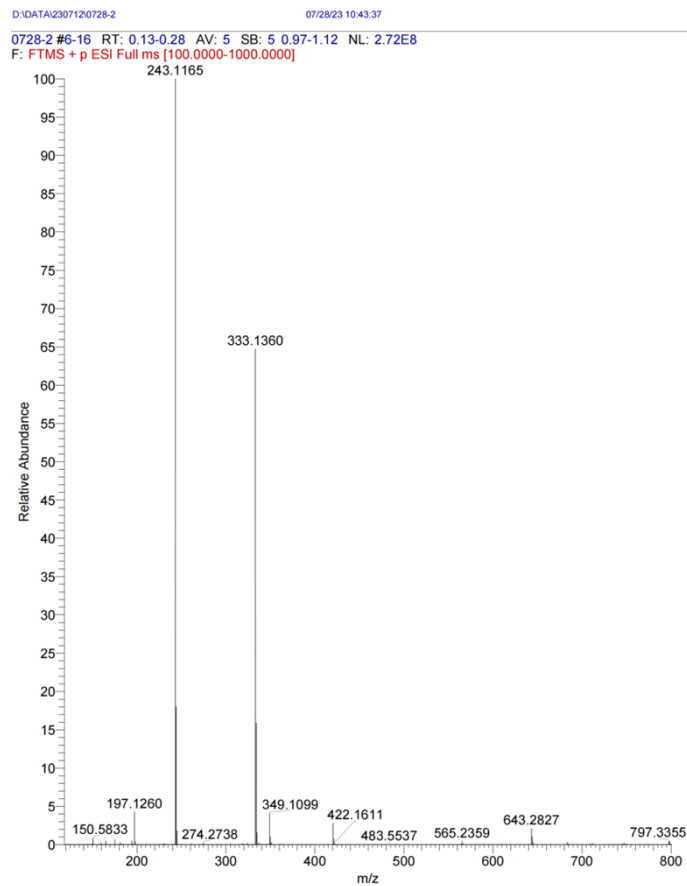

**Figure S27.** The mass spectrum of TPA molecule.

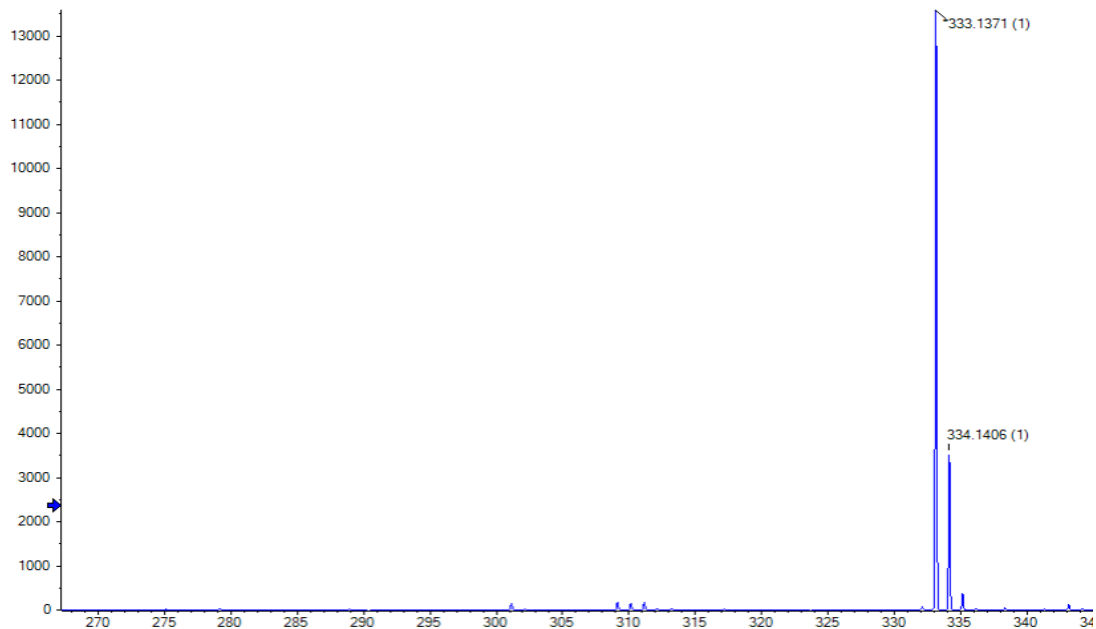

**Figure S28.** The mass spectrum of TPA molecule.

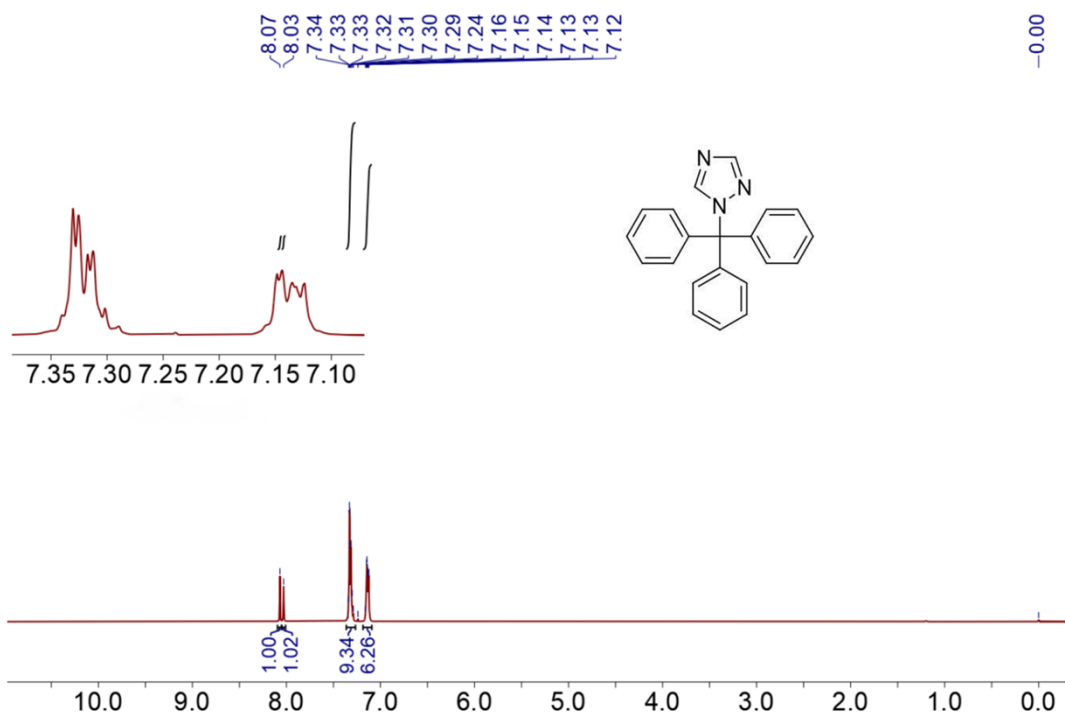

**Figure S29.** The  $^1\text{H}$  NMR spectrum of TTA molecule in  $\text{CDCl}_3$ .

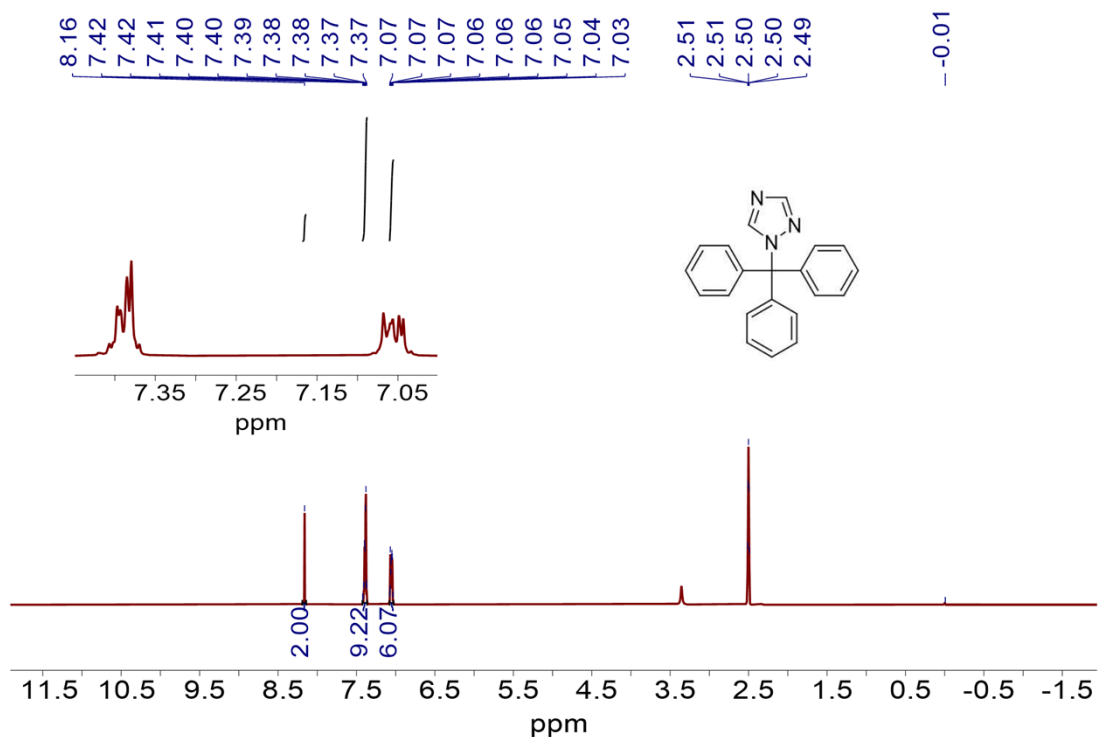

**Figure S30.** The  $^1\text{H}$  NMR spectrum of TTA molecule in  $\text{CD}_3\text{SOCD}_3$ .

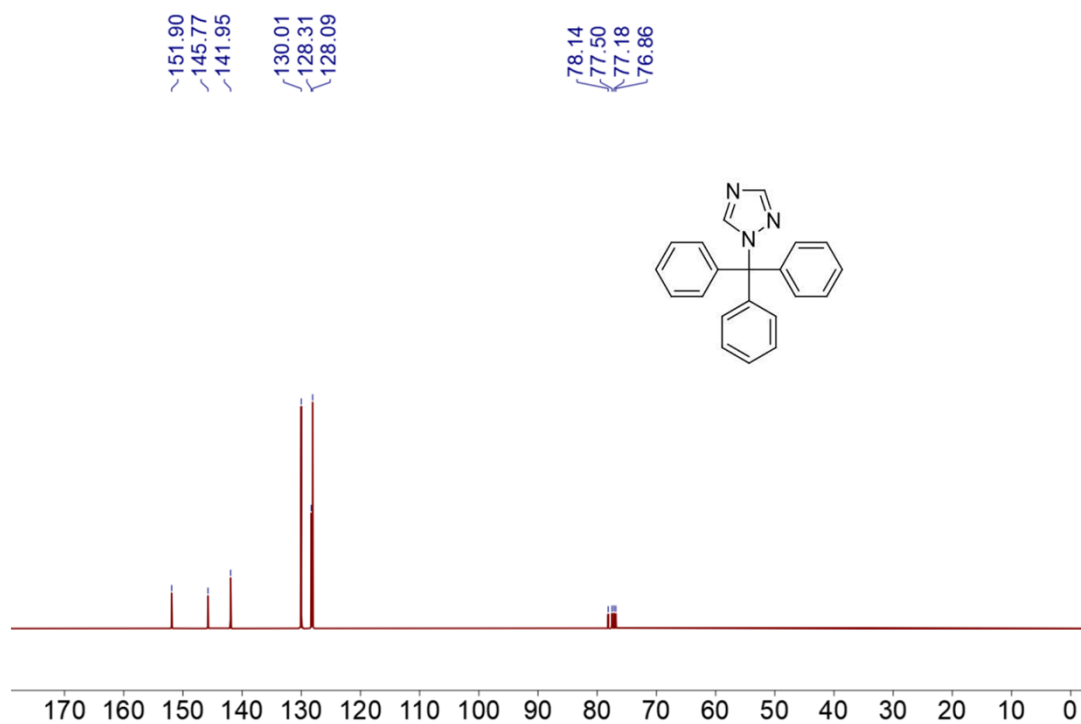

**Figure S31.** The  $^{13}\text{C}$  NMR spectrum of TTA molecule in  $\text{CDCl}_3$ .

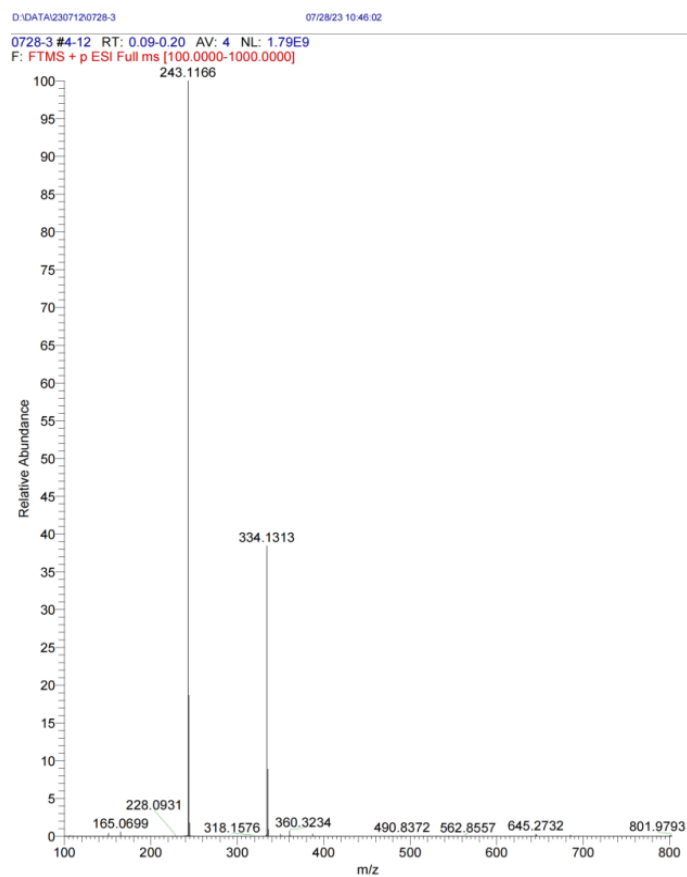

**Figure S32.** The mass spectrum of TTA molecule.

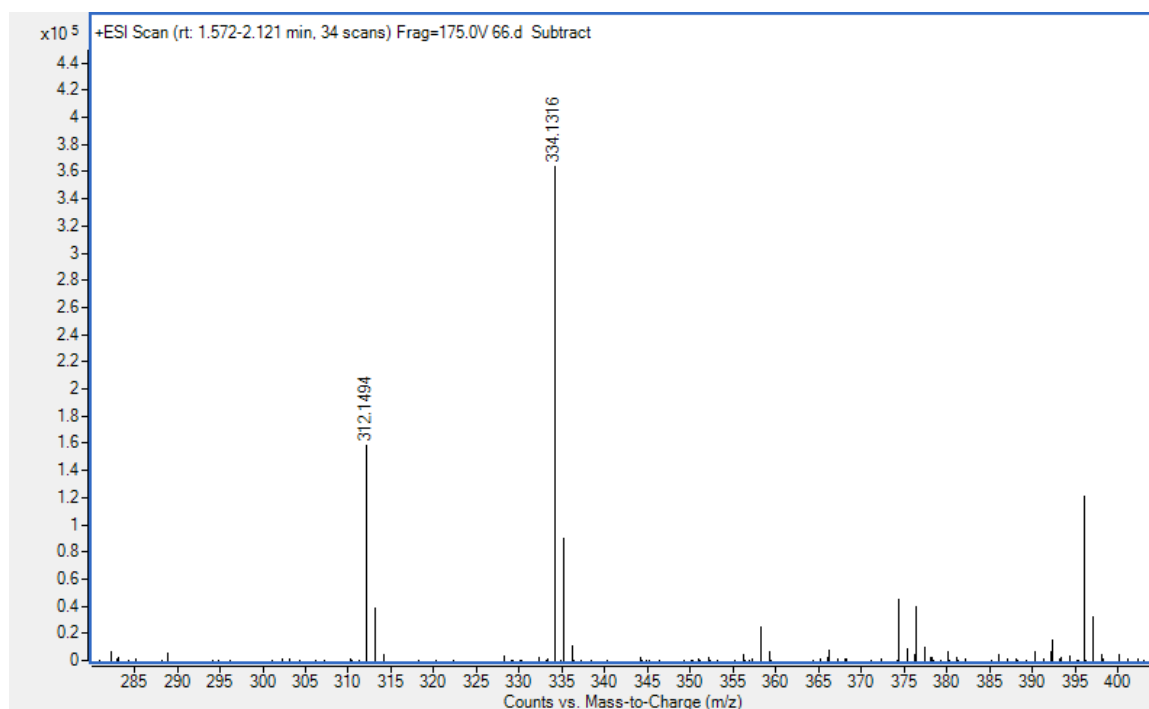

Figure S33. The mass spectrum of TTA molecule.

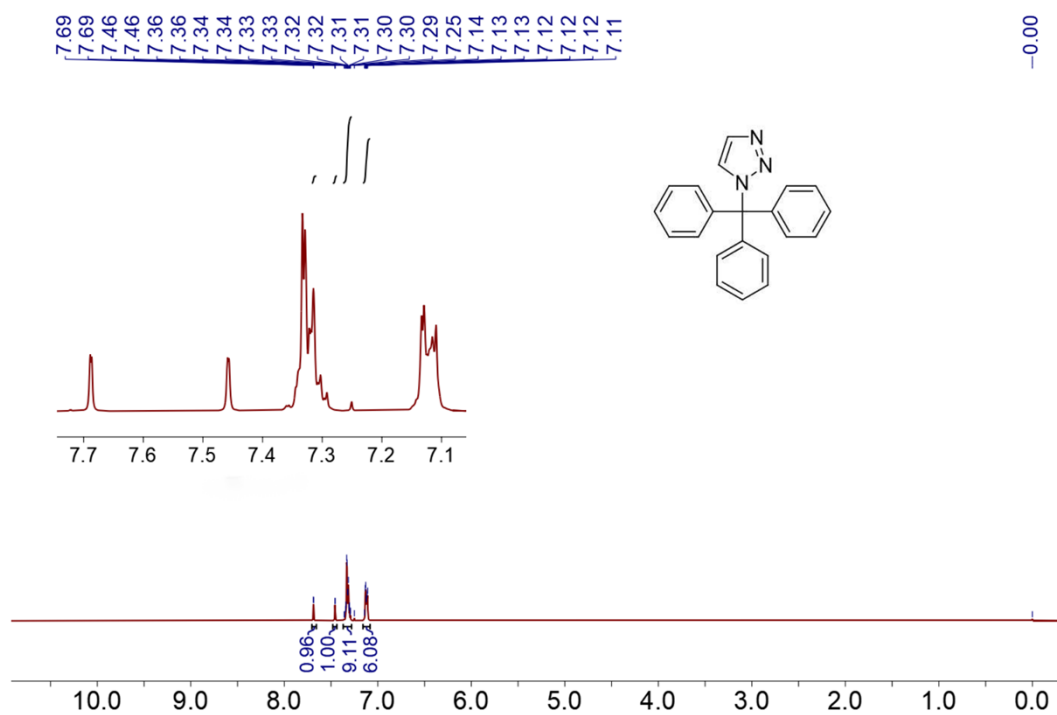

Figure S34. The <sup>1</sup>H NMR spectrum of TTTA molecule in CDCl<sub>3</sub>.

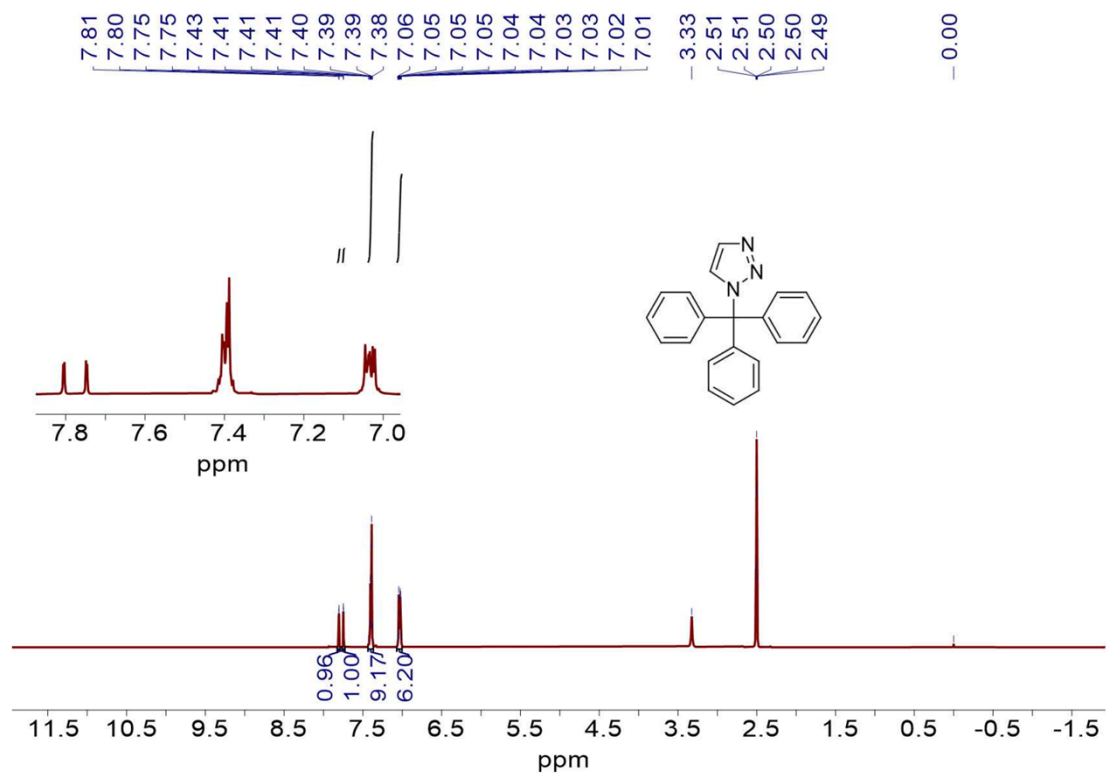

**Figure S35.** The <sup>1</sup>H NMR spectrum of TTTA molecule in CD<sub>3</sub>SOCD<sub>3</sub>.

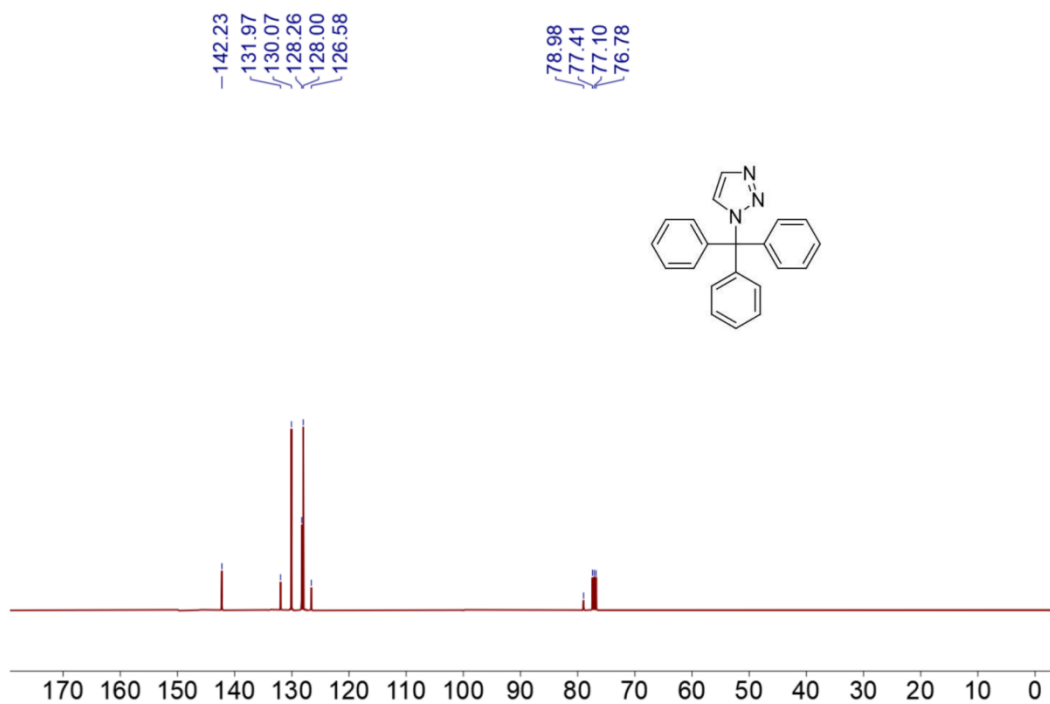

**Figure S36.** The <sup>13</sup>C NMR spectrum of TTTA molecule in CDCl<sub>3</sub>.

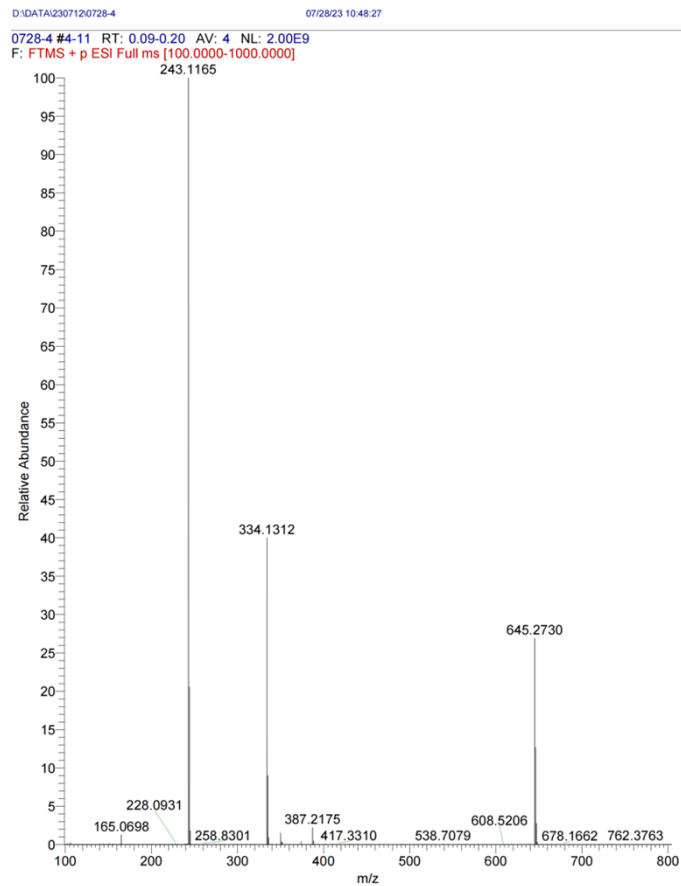

**Figure S37.** The mass spectrum of TTTA molecule.

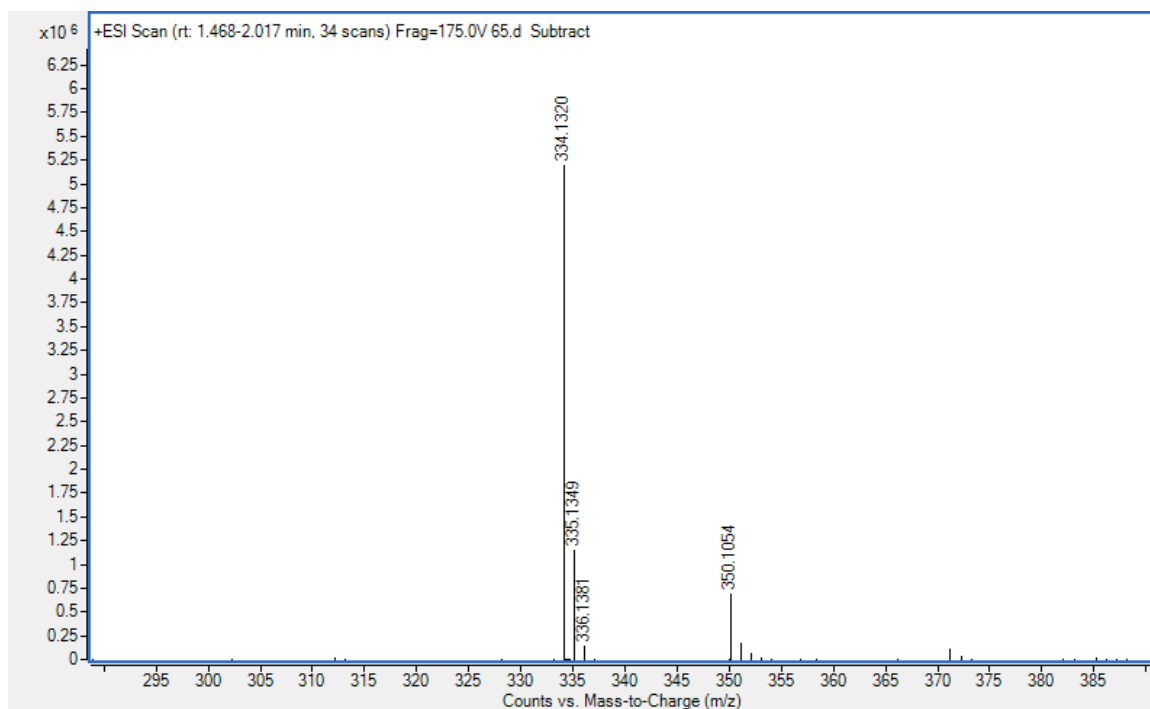

**Figure S38.** The mass spectrum of TTTA molecule.

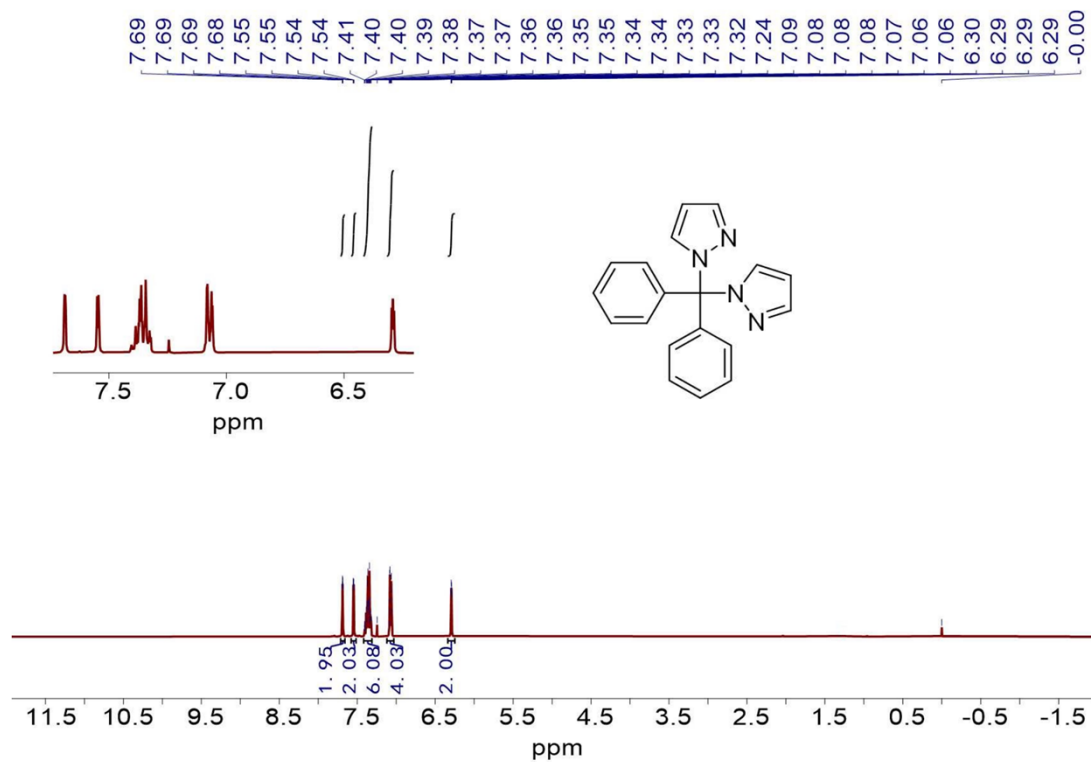

**Figure S39.** The  $^1\text{H}$  NMR spectrum of **DPP** molecule in  $\text{CDCl}_3$ .

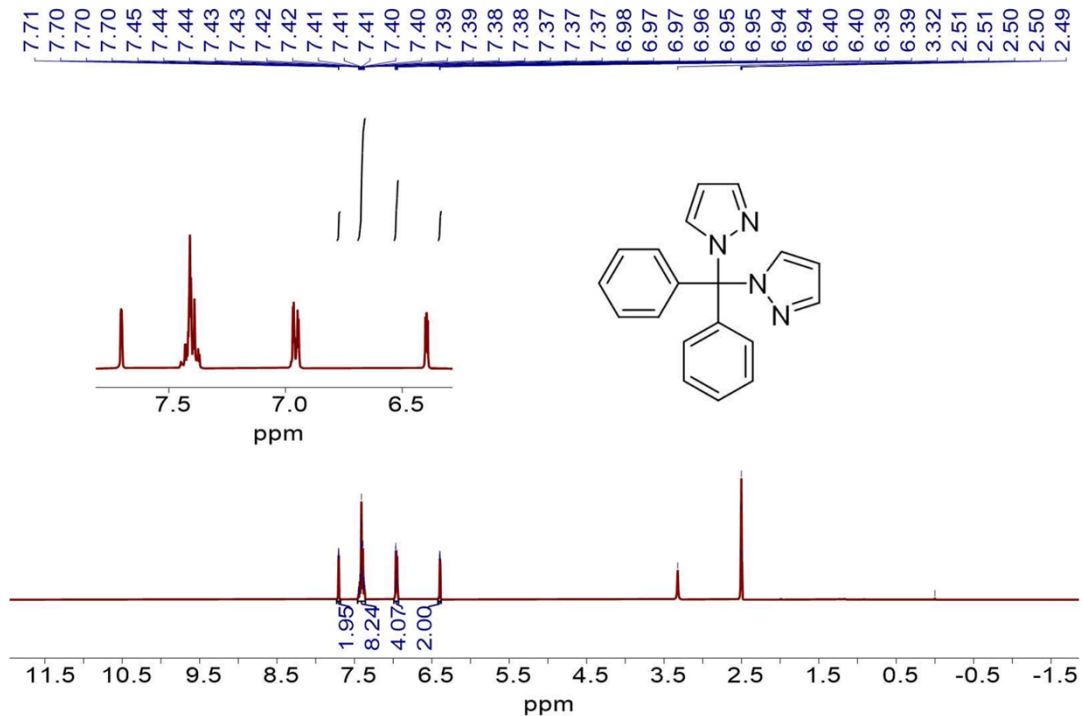

**Figure S40.** The  $^1\text{H}$  NMR spectrum of **DPP** molecule in  $\text{CD}_3\text{SOCD}_3$ .

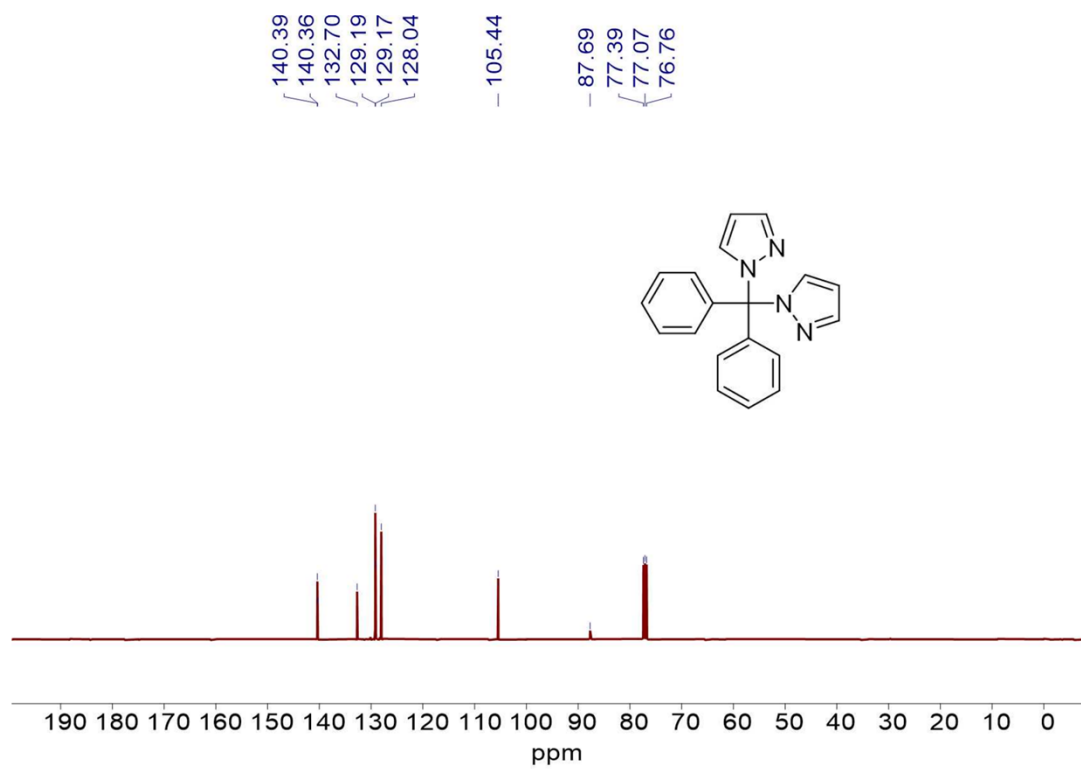

**Figure S41.** The  $^{13}\text{C}$  NMR spectrum of **DPP** molecule in  $\text{CDCl}_3$ .
